1 **The role of pneumococcal extracellular vesicles on the pathophysiology of the kidney**  
2 **disease Hemolytic Uremic Syndrome**

3  
4  
5  
6  
7  
8  
9

Miriana Battista<sup>1</sup>, Bianca Hoffmann<sup>2</sup>, Yann Bachelot<sup>2</sup>, Lioba Zimmermann<sup>1</sup>, Laura Teuber<sup>1</sup>, Aurélie Jost<sup>3</sup>, Susanne Linde<sup>4</sup>, Martin Westermann<sup>4</sup>, Mario M. Müller<sup>5</sup>, Hortense Slevogt<sup>5</sup>, Sven Hammerschmidt<sup>6</sup>, Marc Thilo Figge<sup>2,7</sup>, Cláudia Vilhena<sup>1\*†</sup>, & Peter F. Zipfel<sup>1,7\*†</sup>

10 <sup>1</sup>Department of Infection Biology, Leibniz Institute for Natural Product Research and Infection Biology, Jena, Germany

11 <sup>2</sup>Applied Systems Biology, HKI-Center for Systems Biology of Infection, Leibniz Institute for Natural Product Research and  
12 Infection Biology, Hans Knöll Institute (HKI), Jena, Germany

13 <sup>3</sup>Microverse Imaging Center, Cluster of Excellence “Balance of the Microverse”, Friedrich-Schiller-University Jena, Germany

14 <sup>4</sup>Centre for Electron Microscopy, Jena University Hospital, Jena, Germany

15 <sup>5</sup>Septomics Research Center, Jena University Hospital, Jena, Germany

16 <sup>6</sup>Department of Molecular Genetics and Infection Biology, Interfaculty Institute for Genetics and Functional Genomics, Center  
17 for Functional Genomics of Microbes, University of Greifswald, Greifswald, Germany

18 <sup>7</sup>Institute of Microbiology, Faculty of Biological Sciences, Friedrich-Schiller-University, Jena, Germany

19

20 \*Authors contributed equally to this work.

21

22 † **Corresponding authors:**

23 Peter.zipfel@leibniz-hki.de and Claudia.vilhena@leibniz-hki.de

24 Department of Infection Biology

25 Leibniz Institute for Natural Products and Infection Biology – Hans Knöll Institute

26 Beutenbergstr 11a

27 07745 Jena

28 Germany

29

30 **Running Title:** Pneumococcal extracellular vesicles and host interaction

31

**Keywords:** extracellular vesicles, immunomodulation, cytokines, microbe-host

32  
33  
34  
35  
36  
37  
38  
39  
40  
41  
42  
43  
44  
45  
46  
47  
48  
49  
50  
51  
52  
53  
54  
55  
56  
57  
58  
59

### Graphical Abstract:

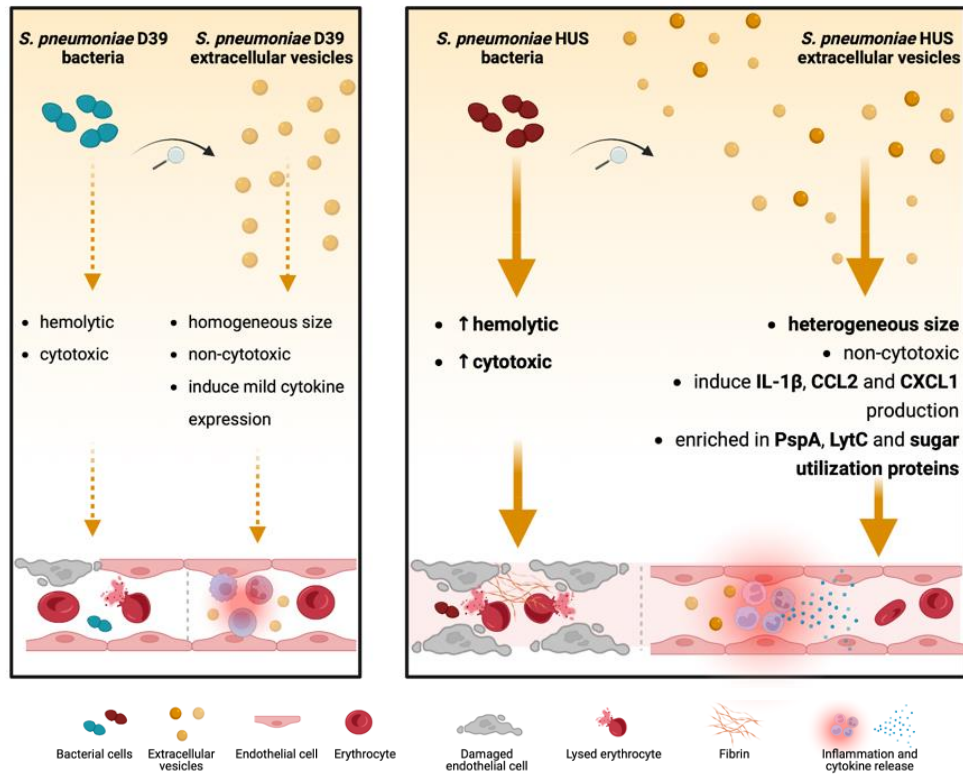

60 **Abstract (238 words)**

61

62 *Streptococcus pneumoniae*-induced hemolytic uremic syndrome (Sp-HUS) is a kidney disease  
63 characterized by microangiopathic hemolytic anemia, thrombocytopenia, and acute kidney injury. This  
64 disease is frequently underdiagnosed and its pathophysiology is poorly understood. In this work, we  
65 compared clinical strains, isolated from infant Sp-HUS patients, to a reference pathogenic strain D39,  
66 for host cytotoxicity and further explored the role of Sp-derived extracellular vesicles (EVs) in the  
67 pathogenesis of a HUS infection. In comparison with the WT strain, pneumococcal HUS strains caused  
68 significant lysis of human erythrocytes and increased the release of hydrogen peroxide. Isolated Sp-  
69 HUS EVs were characterized by performing dynamic light-scattering microscopy and proteomic  
70 analysis. Sp-HUS strain released EVs at a constant concentration during growth, yet the size of the EVs  
71 varied and several subpopulations emerged at later time points. The cargo of the Sp-HUS EVs included  
72 several virulence factors at high abundance, i.e., the ribosomal subunit assembly factor BipA, the  
73 Pneumococcal Surface Protein A (PspA), the lytic enzyme LytC, several sugar utilization and fatty acid  
74 synthesis proteins. Sp-HUS EVs strongly downregulated the expression of the endothelial surface  
75 marker PECAM-1 and were internalized by human endothelial cells. Sp-HUS EVs elicited the release  
76 of pro-inflammatory cytokines (IL-1 $\beta$ , IL-6) and chemokines (CCL2, CCL3, CXCL1) by human  
77 monocytes. These findings shed new light on the overall function of Sp-EVs, in the scope of infection-  
78 mediated HUS, and suggest new avenues of research for exploring the usefulness of Sp-EVs as  
79 therapeutic and diagnostic targets.

80 **Importance (133 words)**

81 *Streptococcus pneumoniae* is a life-threatening human pathogen associated with severe illnesses in the  
82 upper respiratory tract. Disseminated infections also occur, as the kidney disease hemolytic uremic  
83 syndrome. Even though vaccination is available, this pathogen is responsible for a worldwide high  
84 mortality rate, especially among children from least developed countries, where vaccination strategies  
85 are poor or inexistent. It is estimated that 30% of invasive pneumococcal diseases are caused by  
86 antibiotic resistant bacteria, leading to the classification of “serious threat” by the World Health  
87 Organization. In order to prevent cases of severe illness, investigation in the direction of new vaccine  
88 candidates is of utmost importance. Pneumococcal extracellular vesicles pose as ideal candidates for a  
89 serotype-independent vaccine formulation. To this purpose, the aspects of vesicle formation, cargo  
90 allocation and function need to be understood in detail.

91

## 92 **Introduction**

93

94 Hemolytic uremic syndrome caused by *Streptococcus pneumoniae* (Sp-HUS) is a rare and serious  
95 infection-induced kidney disease, clinically defined by microangiopathic hemolytic anemia,  
96 thrombocytopenia, acute kidney failure(1), and endothelial injury(2). The pathophysiology of genetic  
97 and autoimmune forms of HUS are relatively well understood. Defective complement action results in  
98 endothelial damage, thrombus formation, and, ultimately, in occlusion of small vessels in the kidney(3).  
99 However, the pathophysiology of the infection-associated form of HUS remains largely unclear (4). In  
100 around 90% of cases, an infection-related HUS is caused by Shiga-like toxin-producing bacteria, such  
101 as enterohaemorrhagic *Escherichia coli* (STEC) or *Shigella dysenteriae* type 1(5). Sp-HUS accounts for  
102 approximately 5% of all HUS cases and occurs mainly among children under 2 years old, and the  
103 predicted mortality rate is 12.3%(6, 7). The prevalence of this disease and its severe outcomes, if  
104 untreated, desperately argue for investigation of its pathophysiology.

105 *Streptococcus pneumoniae* is a Gram-positive human pathogen capable of causing otitis media, sinusitis,  
106 community-acquired pneumonia, and serious disseminated diseases such as meningitis and septicemia,  
107 following colonization of the upper respiratory tract. Despite the implementation of pneumococcal  
108 polysaccharide and conjugated vaccines, which confer protection only against a defined number of  
109 capsular serotypes, *S. pneumoniae* is still the leading cause of mortality in children under the age of five  
110 (8)(9). In the search for a serotype-independent vaccine, pneumococcal extracellular vesicles (Sp-EVs)  
111 have recently emerged as potential candidates and studies have shown that Sp-EVs and membrane  
112 particles exhibit good immunogenicity(10–13). Pneumococcal EVs have been isolated and shown to  
113 contain proteins such as penicillin-binding protein 1B (Pbp1B), neuraminidase A (NanA),  
114 pneumococcal surface adhesin A (PsaA), pneumolysin (Ply), and the pneumococcal surface protein A  
115 (PspA)(14, 15). Sp-EVs can bind to and be internalized by human macrophages, and epithelial and  
116 dendritic cells, and have demonstrated immunomodulatory capacities *in vitro*, eliciting the production  
117 of IL-10, IL-6, and TNF- $\alpha$  by the host(16–18).

118 EVs are associated with renal diseases such as acute kidney injury, glomerular, and tubular diseases(19).

119 In the kidney, host-derived EVs are produced by blood cells, podocytes, endothelial, and tubular

120 epithelial cells (20–23), and are associated with Shiga toxin-producing *E. coli* HUS (STEC-HUS),  
121 another infection-related HUS form(24–26). However, the role played by pathogen-EVs, e.g., Sp-EVs,  
122 in the establishment of HUS remains elusive.  
123 In the present work, we first compared several cytotoxic features of a pneumococcal HUS clinical isolate  
124 with those of a reference strain and, subsequently, we isolated, characterized, visualized, and assayed  
125 Sp-EVs for their immunomodulatory activity on human host innate immune cells.

126 **Results**

127

128 **Sp-HUS strain shows cytotoxicity towards human red blood and endothelial cells**

129 Microangiopathic hemolytic anemia is a prominent clinical manifestation of HUS(27). Thus, we  
130 investigated the hemolytic activity of eight clinical *S. pneumoniae* HUS strains isolated from infant  
131 patients. When Sp-HUS strains were compared with the pathogenic reference strain D39, referred to as  
132 the wild type (WT), seven of the eight Sp-HUS strains showed stronger lysis of human erythrocytes  
133 (**Fig. 1A**). Hydrogen peroxide (H<sub>2</sub>O<sub>2</sub>) is the main mediator of pneumococcal hemolytic activity and also  
134 contributes to lung cellular damage(28, 29). Hence, the excreted H<sub>2</sub>O<sub>2</sub> in bacterial supernatants from the  
135 clinical pneumococcal strains was quantified (**Fig. 1B**). HUS A strain showed higher H<sub>2</sub>O<sub>2</sub> excretion  
136 (~2-fold more than WT) than the other strains assayed. Previously, we showed that HUS A strongly  
137 binds lactoferrin(30, 31). Thus, the HUS A strain (from now on referred to as the Sp-HUS strain), which  
138 was isolated from a 2-year-old patient suffering from HUS, was chosen as the focus for the rest of this  
139 study. Growth of the WT and Sp-HUS strains in rich medium showed that although both strains reached  
140 the same maximum optical density (OD), the Sp-HUS strain exhibited a shorter lag time, entering  
141 exponential growth earlier (at around 1 h) than WT (**Fig. S1**). Moreover, the exponential phase of growth  
142 is faster for the Sp-HUS strain than the WT.

143 To investigate bacterial cell wall morphology, mid-exponential phase Sp-HUS and WT cultures were  
144 stained with fluorescently-labeled Wheat Germ Agglutinin (WGA), which is a carbohydrate-binding  
145 lectin with high affinity for N-acetylglucosamine (a main structural component of the pneumococcal  
146 cell-wall(32)), and stained cells were visualized using Super Resolution-Structured Illumination  
147 Microscopy (SR-SIM) (**Fig. 1C**). The distribution of WGA across the bacterial cell wall is typically  
148 homogenous, as shown on the WT panel, with exception of the division septa during later stages of cell  
149 division. At an intermediate stage of cell division, WGA dye accumulates at the septum of individual  
150 cells, as shown in the WT panel on the bottom cell (Fig. 1C arrow). The WGA-binding profile of the  
151 Sp-HUS strain differs from the WT since the Sp-HUS strain tended to grow in longer chains in which  
152 WGA frequently appeared bound to the division septum.

153 Next, both bacterial cells and supernatants were assessed for their hemolytic activity and influence on  
154 endothelial cell viability. The cell-associated hemolytic activity of the Sp-HUS strain was significantly  
155 higher (more than 2-fold) than the WT (**Fig. 1D**). Moreover, the supernatant fraction of the Sp-HUS  
156 strain also showed higher hemolytic activity against human erythrocytes than that of the WT (**Fig. 1E**).  
157 Since intracytoplasmic isocitrate dehydrogenase (IDH) converts resazurin into resorufin, a fluorescent  
158 end product, in intact cells, cellular metabolic activity can be monitored by appearance of this  
159 fluorescent product(33). Sp-HUS cells decreased the viability of human endothelial cells by more than  
160 80%, consistent with their highly toxic activity in the hemolytic assay (**Fig 1F**). By contrast, however,  
161 the supernatant of neither bacterial strain decreased the viability of endothelial cells (**Fig. 1G**), which  
162 did not correlate with the hemolytic activity observed for the Sp-HUS supernatant. The effect of the Sp-  
163 HUS strain on endothelial cell retraction was also evaluated using scanning electron microscopy (SEM).  
164 An image analysis pipeline was developed using the visual programming language JIPipe(34) (steps  
165 summarized in **Fig. S2A-F**) to quantify the background fraction as an indirect measure of human cell  
166 retraction. Pneumococcal strains led to high levels of cell retraction (approx. 6-fold more than the  
167 unstimulated control). However, no significant difference was observed between Sp-HUS and the  
168 reference pathogenic strain (**Fig. S2G**).

169 To provide insights into relevant, cytotoxicity-related genes, the transcriptome of each strain was  
170 analyzed by RNAseq. Five biological replicates of each strain were assayed and differential gene  
171 expression (DGE) analysis was conducted using DESeq2 (35). Principal Component Analysis (PCA)  
172 validated the clusterization of replicates from each strain (**Fig. 1H**). Of the 572 genes identified, 50  
173 genes (**Fig. 1I** and **Table 1**) matched the thresholds on expression and significance ( $|\log_2 FC| > 1,5$   
174 and adjusted  $p$ -value  $< 0.05$ ). Upregulated genes in the Sp-HUS strain included genes encoding two  
175 choline-binding proteins (*lytA* and *pcpA*), two neuraminidases (*nanA* and *nanB*), genes involved in the  
176 anaerobic ribonucleotide reductase system (*nrdD* and *nrdG*), genes related to glycerol and sugar  
177 metabolism (*glpA*, *glpB*, *glpD*, *glpK*, and *galE*), and two genes involved in pyruvate metabolism to  
178 ethanol (*adhE* and *adhP*). Among the most highly downregulated genes were an iron-sulfur biogenesis  
179 system gene (*sufB*), an amino acid synthesis gene (*dapA*), a large conductance mechanosensitive channel  
180 gene (*mscL*), *ltrA*, *tnpB*, and a competence gene (*celB*). Based on the gene ontology (GO) analysis (**Fig.**



181 **S3A**), the most significantly enriched GO terms referred to “organic substance metabolic/catabolic  
182 process”, “carbohydrate metabolic/catabolic process”, and “catabolic process”. Other enriched terms  
183 referred to “polysaccharide biosynthesis”, “glucan and glycogen metabolism”, and “energy derivation  
184 by oxidation of organic compounds”. A network analysis based on the GO enrichment was performed  
185 (**Fig. S3B**). Three large clusters (relating to metabolic and catabolic processes) and four minor clusters  
186 were observed. These results suggest that, in general, metabolic and catabolic related pathways are  
187 remarkably altered in the Sp-HUS strain and a complex rearrangement of carbohydrate, glycogen, and  
188 glycan metabolic pathways might contribute to the pathogenicity of this strain.

189

### 190 **Heterogeneous size profile and altered protein cargo characterize Sp-HUS EVs**

191 We showed that Sp-HUS strain causes release of hydrogen peroxide, hemolysis of erythrocytes, and  
192 reduced endothelial cell viability. Sp-HUS-derived supernatant also caused strong hemolysis, which  
193 raised the question of which supernatant components caused this effect. Pneumococcal extracellular  
194 vesicles (Sp-EVs) have important immunomodulatory capacities, affecting both human macrophages  
195 and human epithelial cells (18, 36). To address the role of Sp-HUS EVs in the interaction with host cells,  
196 Sp-EVs were isolated and characterized.

197 Protrusions at several subcellular locations could be observed (arrows) when *S. pneumoniae* strains were  
198 visualized using SEM (**Fig. 2A**). The protrusions or particles were visible at the bacterial septum, poles,  
199 and mid-cell, and occasionally covering the entire cell surface. These different locations relate to the  
200 bacterial cell cycle stage and the intrinsic capacity of each individual bacterium to produce these  
201 particles(15). These structures were heterogeneous in size and their round shape was suggestive of  
202 extracellular vesicles (EVs)(37–39). The cell-attached structures visualized by SEM were eventually  
203 released into the supernatant as fully-formed EVs. EVs isolated from bacterial supernatants were  
204 visualized by dynamic light-scattering microscopy, using nanoparticle tracking analysis, and the  
205 movement of the particles was followed through a microfluidic circuit. Representative snapshots of these  
206 circulating particles are shown in **Fig. 2B**. To ascertain whether the formation and size of EVs related  
207 to the bacterial growth phase, Sp-EVs were characterized over time. Histograms representative of the

208 particle profile are depicted in **Fig. 2C** and a sum-up graph of size and concentration can be seen in **Fig.**  
209 **2D** (WT-EVs) and **Fig. 2E** (Sp-HUS-EVs). WT-EVs maintain a stable size range (~120 nm) and a rather  
210 homogeneous population (unimodal histogram). The concentration increases slightly after 4 h of growth.  
211 On the other hand, the size of Sp-HUS EVs decreased over time (from ~125 nm to ~60 nm), and the  
212 population became very heterogeneous, with several subpopulations appearing after only 2 h growth,  
213 and culminated with five subpopulations at time point 4 h. By contrast, with WT-EVs, which increased  
214 in concentration during growth, the concentration of Sp-HUS EVs was stable throughout the course of  
215 growth. This suggested a difference in the regulation of EV formation between the Sp-HUS and WT  
216 strains.

217 To investigate whether different production stimuli, i.e., host produced compounds, influenced vesicle  
218 concentration and size, a co-cultivation multi-well model was developed using the *Transwell* system. In  
219 this model, separate compartments, within the wells of 24-well plates, were seeded with HUVECs on  
220 the basolateral side and *S. pneumoniae* cultures on the apical side, separated by a 0.40 µm pore size  
221 membrane, allowing co-cultivation but avoiding direct contact between bacteria and host cells (**Fig.**  
222 **S4A**). Co-cultivation led to time- and concentration-dependent EV formation (**Fig. S4B**); however, no  
223 substantial difference in EV size was observed (**Fig. S4C**). When the Sp-HUS and WT strains were  
224 compared at the same apical bacterial concentration, the formation of EVs in the basolateral  
225 compartment was higher for the Sp-HUS strain (**Fig. S4D**).

226 Pneumococcal EVs contain transmembrane proteins and lipoproteins(40), and putative functions have  
227 been attributed to Sp-EVs based on their cargo(15). Analysis of the protein composition of Sp-EVs by  
228 mass spectrometry analysis revealed that BipA, a 50S ribosomal subunit assembly factor, was the most  
229 abundant protein identified in Sp-HUS EVs, followed by DeoD, a purine nucleoside phosphorylase (**Fig.**  
230 **2F and Table 2**). The fatty acid biosynthesis proteins, FabG and Nox(41), and several proteins related  
231 to sugar utilization (e.g., GlgD, GlpK, Gnd, GmpA, and PtsI) (42, 43) were also found at higher  
232 abundance in the EVs of the Sp-HUS strain than in those of the WT. Additionally, two choline-binding  
233 proteins were more abundant in the Sp-HUS EVs: LytC and the Pneumococcal Surface Protein A  
234 (PspA), an immune evasion protein (44–46).

235 Proteins found in the Sp-EVs, from both Sp-HUS and WT, are shown in **Table S1**. Choline-binding  
236 proteins (CbpC, CbpF, and PcpA), as well as the penicillin-binding protein 1A (Pbp1A) and the pore-  
237 forming toxin pneumolysin (Ply), were found in both EV fractions. Several cell division-related proteins,  
238 e.g., DivIVA, DnaA, EzrA, FtsA, FtsE, FtsH, FtsX, and FtsZ, and the capsular polysaccharide  
239 biosynthesis protein CpsC were also found at similar levels in EVs from both strains. These findings  
240 suggest that the biogenesis of pneumococcal EVs is potentially site-specific, occurring preferably at  
241 bacterial septa.

242

### 243 **Sp-HUS EVs do not hemolyze red blood cells but strongly bind to human endothelial cells**

244 Human erythrocyte lysis and human endothelial cell viability assays were performed with purified Sp-  
245 EVs. Neither Sp-HUS EVs nor WT-EVs lysed erythrocytes (**Fig. 3A**) or affected HUVEC viability (**Fig.**  
246 **3B**). Next, the direct interaction of Sp-EVs with human endothelial cells was evaluated at the single-cell  
247 level by confocal laser-scanning microscopy (CLSM). The expression of the Platelet Endothelial Cell  
248 Adhesion Molecule-1 (PECAM-1-FITC, green fluorescence) was assessed in HUVECs challenged with  
249 either Sp-HUS EVs or WT-EVs. PECAM-1 is an endothelial cell surface protein known to act as a  
250 receptor for pneumococci adhesion to the endothelium, and to be upregulated upon infection and  
251 stimulation by pathogen-associated molecules(47–49). Representative microscopy images (**Fig. 3C**)  
252 showed that the PECAM-1-FITC signal decreased in the presence of Sp-HUS EVs. The presence of  
253 WT-EVs led to heterogeneous PECAM-1-FITC expression, with some HUVECs highly expressing this  
254 molecule, whereas others exhibited the baseline FITC level. The semi-quantification of PECAM-1  
255 signal corroborated these findings, in particular the heterogeneous activation profile associated with  
256 WT-EVs (**Fig. 3D**). Since Sp-EVs (both WT and HUS EVs) induced lower PECAM-1 expression than  
257 the control, it indicates either that Sp-EVs do not activate endothelial cells or that they repress the  
258 expression of endothelial adhesion molecules. It was demonstrated that Sp-HUS EVs and WT-EVs  
259 negatively affected the expression of the Intercellular Adhesion Molecule-1 (ICAM-1) to a similar  
260 extent (**Fig S5**).

261 Internalization of Sp-EVs by HUVECs was assayed and representative microscopy images highlighted  
262 the retention of EV clusters at different locations on HUVEC cells (**Fig. 3E**). Sp-HUS EVs bound to  
263 endothelial cells and prominent intracellular colored (red-to-yellow) clusters indicated the  
264 internalization of EVs. However, at the resolution level achieved, the precise cytoplasmic localization  
265 of these clusters was not possible. The increased (by approximately 14%) intracellular staining of  
266 HUVECs by Sp-HUS EVs, compared with that of the WT-EVs, indicated a higher level of Sp-HUS EV  
267 internalization (**Fig. 3F**).

268 In summary, Sp-EVs are non-cytotoxic towards human erythrocytes or endothelial cells, but  
269 downregulate endothelial adhesion molecule expression. However, EVs isolated from the HUS strain  
270 bound more strongly to endothelial cells than those of the reference strain, identifying this as a relevant  
271 feature to consider in the study of HUS infection.

272

### 273 **Sp-HUS EVs elicit cytokine and chemokine release from human monocytes**

274 The capacity of Sp-EVs to elicit an innate immune response in the host was tested by measuring cytokine  
275 and chemokine expression quantitative real-time PCR (qRT-PCR; **Fig. 4A**). The transcription of several  
276 cytokines and chemokines (IL-1 $\beta$ , IL-6, TNF- $\alpha$ , CXCL10, Serpin E1, and CCL2) was higher in  
277 monocytes incubated with Sp-EVs than in untreated monocytes (**Fig. 4B-G**). Moreover, Sp-HUS EVs  
278 induced greater IL-1 $\beta$  transcription than did WT-EVs (**Fig. 4B**). For the other tested cytokines, the  
279 transcriptional response in monocytes appeared to be essentially induced at the same level by both Sp-  
280 HUS EVs and WT-EVs (**Fig. 4C-G**). Monocyte supernatants were assayed for the presence of cytokines  
281 and chemokines by proteome array (**Fig. 4A**). Sp-EVs induced secretion of several  
282 cytokines/chemokines from monocytes, including CCL2, CCL3, CXCL1, CXCL10, IL-6, and Serpin  
283 E1 (**Fig. 4H**). The proteome array results are in accordance with the transcriptional profile described  
284 above for selected cytokines (**Fig. 4C-G**), where upregulation was observed after monocyte incubation  
285 with Sp-EVs. However, the expression of most of the cytokines/chemokines (CCL2, CCL3, CXCL1,  
286 IL-6, and Serpin E1) was higher in response to Sp-HUS EVs than WT-EVs (**Fig. 4H**), suggesting that  
287 extracellular vesicles isolated from the HUS strain elicit a stronger innate immune response compared

288 with the reference strain-derived EVs. The production of IL-6 and TNF- $\alpha$  (two major pro-inflammatory  
289 molecules) by human monocytes was further investigated at the protein level by an enzyme-linked  
290 immunosorbent assay (ELISA), which has a higher sensitivity than the proteome array (**Fig. 4I-J**). The  
291 results at the protein level of IL-6 and TNF- $\alpha$  were consistent with their transcriptional levels; their  
292 production was induced by both WT and Sp-HUS EVs.

293

294 Taken together, the results show that EVs isolated from *S. pneumoniae* promote pro-inflammatory  
295 cytokine and chemokine transcription and translation in human monocytes, with a more pronounced  
296 effect seen with Sp-HUS EVs. The capacity of Sp-HUS EVs for eliciting cytokine production in  
297 monocytes, part of the first innate immune response, is an interesting aspect to consider in the  
298 understanding of the host immune reaction towards Sp-HUS strain and support the important role that  
299 *S. pneumoniae* EVs play in the designing of a vaccine for immunization.

300

301

## 302 **Discussion**

303 The pathophysiology of the pneumococcal-mediated kidney disease, hemolytic uremic syndrome (Sp-  
304 HUS), remains unclear. In this study, we identified pathologic differences between a *S. pneumoniae*  
305 HUS strain and a WT strain with regard to their extracellular vesicles (EVs).

306 Kidney injuries derived from *S. pneumoniae* infections range from proteinuria to acute kidney  
307 failure(50, 51). The clinical Sp-HUS strain mediated endothelial damage (**Fig. 1**). Previous reports on  
308 Sp-HUS pathogenesis have demonstrated the crucial role played by pneumococcal neuraminidase in  
309 exposing the Thomsen-Friedenreich antigen on the surface of the host cell membranes and thus  
310 generating damage(52, 53). *NanA* and *nanB*, two neuraminidase genes, were upregulated in the Sp-HUS  
311 strain, which aligns with previous knowledge on HUS pathophysiology. Sp-HUS strain might be better  
312 adapted to anaerobic growth, including during blood infection where oxygen is less available, as  
313 supported by the downregulation of *sufB* and upregulation of *nrdDG*(54–56). However, changes in the  
314 transcriptome do not always translate to changes at the proteome level(57), thus conclusions should be  
315 carefully drawn, and further studies on the metabolome of HUS clinical strains are necessary to confirm  
316 these observations.

317 Host-derived EVs are associated with STEC-HUS pathology(24). Ståhl *et al.* described a novel  
318 mechanism of transfer of a bacterial virulence factor (Stx), attached to blood cell-derived microvesicles,  
319 to kidney glomerular endothelial cells(58). This study emphasized the usefulness of microvesicles in  
320 mediating the circulation of bacterial toxins, which may lead to immune evasion and ultimately to  
321 cellular renal damage. From the results presented in this work, it can be speculated that virulence  
322 proteins could be loaded into EVs and act locally, outside the alveoli, in a similar way to that observed  
323 for TatD, a pneumococcal endo-deoxyribonuclease involved in neutrophil extracellular trap  
324 evasion(59). This potential site-directed and cargo-specific capacity of Sp-HUS EVs would allow  
325 damage to the kidney even in the absence of bacteria, as EVs could diffuse into the blood stream and  
326 eventually unload their toxic cargo onto kidney endothelial cells.

327 Sp-HUS EVs exhibited growth-dependent size heterogeneity (**Fig. 2**). Size heterogeneity has been  
328 observed for eukaryotic EVs, where it relates to divergent roles in cancer biology(60), and, additionally,  
329 EV subpopulations frequently display different cargo(16, 18)(61). We were also intrigued by this

330 heterogeneity and so separated different, small subpopulations by size exclusion chromatography and  
331 tested each fraction for its cytotoxicity towards human endothelial cells. Our preliminary data did not  
332 show any difference between the fractions (data not shown); however, the separation protocol needs to  
333 be optimized to perform a more fine-tuned separation of the small subpopulations. The differential size  
334 and concentration observed for Sp-HUS EVs might also relate to their distinct biogenesis.

335 Proteomic analysis (**Fig. 2F** and **Table 2**) revealed abundant sugar utilization systems proteins in Sp-  
336 HUS EVs. These included PtsI, an enzyme belonging to the phosphotransferase system (PTS), and  
337 GlgD, a transferase related to glucose metabolism, which were previously shown to be overexpressed  
338 in *S. pneumoniae* D39 grown in mannose and mucin, respectively(42, 62). The ability to optimize  
339 growth in different sugars is a strategy utilized by several pathogens during host interaction in order to  
340 exploit the prevailing environmental conditions(63). The intricate metabolic rearrangements involving  
341 glucose and mannose should be a focus for future research. Additionally, the presence of DivIVA, EzrA,  
342 and LytC in EVs suggests a possible septal origin for EV formation, as earlier hypothesized by  
343 Greenawalt in the 1970s(64).

344 Sp-HUS EVs attached to and were internalized by human endothelial cells, in addition to eliciting a pro-  
345 inflammatory innate immune response in human monocytes (**Fig. 3** and **Fig. 4**). In previous studies, it  
346 was observed that Sp-EVs are promptly internalized by macrophages(16, 18) and epithelial cells(36). In  
347 those studies, depending on the pneumococcal strain assayed and on the source of the immune cells,  
348 several cytokines had altered expression, including TNF- $\alpha$ , IL-6, IL-10, and IL-1 $\beta$ . Sp-HUS EVs  
349 induced higher production of CCL2, CCL3, CXCL1, and CXCL10. Together with IL-6 and Serpin E1,  
350 these chemokines are involved in promoting inflammation (65–67). Despite inducing cytokine release,  
351 Sp-HUS EVs had a negligible cytotoxic effect on the host cells, corroborating the results of previous  
352 studies(11, 68, 69), which strengthens their potential use as immunization tools. Moreover, the presence  
353 of PspA and AliA in Sp-EVs (**Table S1**) has previously been associated with high levels of effective  
354 protection against *S. pneumoniae*, as shown by reduced bacterial loads in a murine model of  
355 pneumococcal colonization(70, 71).

356 Even though vaccination against this pathogen is available, its efficacy strongly depends on the prevalent  
357 pneumococcal serotypes (72, 73). Pneumococcal serotypes are defined by the biochemical structure of

358 their polysaccharide capsule; they are of greatest relevance in the rollout of infection and more than 100  
359 serotypes have been described to date(74). The prominent serotypes of Sp-HUS, before the introduction  
360 of the pneumococcal vaccine, were 3, 6B, 8, 9V, 14, 19, and 23F(5). Soon after the introduction of the  
361 7- and 13-valent pneumococcal protein conjugate vaccines in 2000 and 2010, respectively, there was a  
362 shift of Sp-HUS-associated serotypes to those that were not covered by the vaccines. Studies carried out  
363 in the USA and the UK reported that Sp-HUS cases were mainly caused by serotypes 1, 3, 7F, and, most  
364 abundantly, 19A(75, 76). Multiplex PCR(77) revealed that the clinical Sp-HUS strain belongs to the  
365 19A serotype group, precisely the serotype frequently observed after the introduction of protein  
366 conjugate vaccination (**Fig. S6**). Initial screens of several Sp-HUS strains (**Fig. 1A and B**) showed a  
367 high degree of phenotypic heterogeneity, which can be explained, in part, by their potentially different  
368 serotypes and, additionally, by unknown specific patient-related issues (age, gender, co-morbidities,  
369 medication, etc.).

370

371 In conclusion, we showed that substantial differences exist between the Sp-EVs produced by a clinical  
372 HUS isolate and those produced by a reference pneumococcal strain. These differences included size  
373 and concentration of EVs, their protein cargo, and their ability to evoke inflammatory responses in the  
374 host. Sp-HUS EVs might also be carriers of toxins that specifically target the kidney endothelial cells  
375 and allow bacteria to avoid direct contact with blood-circulating innate immune cells. Based on this  
376 initial characterization, we suggest that Sp-HUS EVs might be good candidates for Sp-HUS diagnosis  
377 as they can be easily isolated from the blood or urine of patients and pneumococcal proteins, e.g., BipA  
378 and PspA, could act as specific, likely selective Sp-HUS EV markers. Earlier diagnosis of this kidney  
379 disease would allow prompter therapeutic intervention, which could prevent the development of more  
380 serious outcomes for the patient.

381

382



## 383 **Material and Methods**

384

### 385 **Bacterial strains and growth conditions**

386 The pathogenic strain *Streptococcus pneumoniae* D39 was used as the reference strain(78). Clinical  
387 pneumococci strains, isolated from patients with HUS (HUS strains), were obtained from PD Dr. Med.  
388 Giuseppina Sparta, Zürich, Switzerland. All *S. pneumoniae* strains were grown in liquid Todd-Hewitt  
389 broth (Roth®) supplemented with yeast extract (THY) at 37°C in 5% (v/v) CO<sub>2</sub>. Blood agar plates were  
390 prepared from blood agar (VWR®) with addition of 5% (v/v) defibrinated sheep blood (Thermo  
391 Scientific®). Growth was monitored by measuring the optical density at 600 nm (OD<sub>600</sub>).

392

### 393 **Cell culture and cell harvesting**

394 Human umbilical vein endothelial cells (HUVECs, CRL-1730) were cultivated in Dulbecco's modified  
395 Eagle's medium, DMEM (Lonza®), supplemented with 10% (v/v) fetal bovine serum (Biochrom®), 6  
396 mmol/L l-glutamine (Lonza®), and a mixture of penicillin/streptomycin (100U/100 µg/mL, Sigma®) at  
397 37°C in the presence of 5% CO<sub>2</sub>. The fully supplemented DMEM medium is referred to as growth  
398 medium.

399 Adherent human cells were washed with pre-warmed Dulbecco's phosphate-buffered saline (DPBS;  
400 Lonza®) and harvested by incubation for 10 min at 37°C with PBS containing trypsin/EDTA (Gibco®).  
401 Cell detachment was stopped by adding 10 mL growth medium. After centrifugation, the pellet was  
402 resuspended in 1 mL growth medium and cells were counted using a cell counter CASY (OLS®CASY).

403

### 404 **Hemolysis assay**

405 *S. pneumoniae* strains were grown at 37°C in 5% CO<sub>2</sub> until mid-logarithmic phase was reached. Aliquots  
406 of 100 µL red blood cells were incubated in a 96-well plate together with the same volume of bacterial  
407 suspensions in THY, bacterial suspensions in PBS, bacterial supernatants, or Sp-EVs. PBS was used as  
408 a negative control and bi-distilled water as a positive control. The plates were incubated at 37°C with  
409 slight agitation (300 rpm) for 30 min (the positive control was added only 10 min prior to the end of the

410 incubation). The plates were immediately centrifuged (400 g, 15 min, RT) before the resulting  
411 supernatants were transferred to a fresh 96-well plate and their OD at 540 nm was measured.

412

### 413 **Hydrogen peroxide measurement**

414 *S. pneumoniae* strains were grown as previously described, and after centrifugation, supernatants were  
415 filtered and immediately assayed for the presence of hydrogen peroxide using the Hydrogen Peroxide  
416 Colorimetric Assay (Biocat), following manufacturer instructions. Uninoculated growth medium (THY)  
417 was used as the negative control and its value was subtracted from all the absorbances measured.

418

### 419 **Super Resolution-Structured Illumination Microscopy (SR-SIM)**

420 SR-SIM was performed to visualize cell wall staining in single bacterial cells. Briefly, bacteria were  
421 grown in THY at 37°C in 5% CO<sub>2</sub> until mid-exponential phase. After washing with DPBS, bacteria were  
422 stained with CF@488-conjugated Wheat Germ Agglutinin (WGA; biotium®) for 1 h in the same  
423 incubation conditions. Bacterial cells were then washed and fixed with 4% (v/v) paraformaldehyde  
424 (PFA) solution for 20 min at 4°C. For the SR-SIM imaging, 10 µl of the sample was spotted on 1%  
425 agarose pads. The agarose pads were covered with No. 1.5H coverslips (Roth) and stored at 4°C for  
426 further imaging. The SR-SIM data were acquired on an Elyra 7 system (Zeiss) equipped with a 63×/1.4  
427 NA Plan-Apochromat oil-immersion DIC M27 objective lens (Zeiss), a Piezo stage, and a PCO edge  
428 sCMOS camera with 82% QE and a liquid cooling system with 16-bit dynamic range. Using Lattice  
429 SIM mode, images were acquired with 13 phases. WGA CF@488 was detected with a 488 nm laser and  
430 a BP 495-590 emission filter. Super resolution images were computationally reconstructed from the raw  
431 data sets using default settings on ZenBlack software (Zeiss). Images were analyzed using the Fiji  
432 ImageJ software(79).

433

### 434 **Endothelial cell viability assay**

435 The cytotoxicity of *S. pneumoniae* cells, supernatants, and Sp-EVs towards human endothelial cells was  
436 accessed by the CellTiter-Blue® (CTB) Cell Viability Assay (Promega), according to manufacturer's  
437 instructions. HUVECs were seeded in 96-well plates (Thermo Scientific®) at a density of 1.5x10<sup>4</sup>

438 cells/well. Cells were cultivated at 37°C in 5% CO<sub>2</sub> until confluence was reached. Mid-exponentially-  
439 grown *S. pneumoniae* strains, Sp-supernatants, or Sp-EVs were incubated with HUVEC for 1 h under  
440 the same growth conditions. Tert-butyl hydroperoxide (400 µM) and DMEM were used as negative and  
441 positive cell viability controls, respectively. Subsequently, gentamicin (500 mg/mL) was added to the  
442 medium for 1 h to kill any extracellular bacteria that would otherwise contribute to the cell viability  
443 measurements. HUVECs were then washed with pre-warmed DPBS and CTB (100 µL) was added to  
444 each well. Following incubation for 16 h at 37 °C in 5% CO<sub>2</sub>, the absorbance of each well was measured  
445 at 570 nm using a Tecan® Safire 2 microplate reader. In this assay, metabolically viable endothelial  
446 cells convert the redox dye (resazurin) into a fluorescent end product (resorufin). Statistical analysis was  
447 performed using Prism version 9 for Windows (GraphPad Software, La Jolla, CA).

448

#### 449 **RNA seq**

450 Total RNA was isolated from bacterial cells using a universal RNA purification kit (roboklon) and a  
451 subsequent clean up step was performed using a Cleanup kit (Monarch®RNA), both according to the  
452 manufacturer's instructions. cDNA libraries were prepared by vertis Biotechnology AG (Freising,  
453 Germany). The ribodepleted RNA samples were first fragmented using ultrasound (1 pulse of 30 s at  
454 4°C), and then an oligonucleotide adapter was ligated to the 3' end of the RNA molecules. First-strand  
455 cDNA synthesis was performed using M-MLV reverse transcriptase and the 3' adapter as primer. The  
456 first-strand cDNA was purified and the 5' Illumina TruSeq sequencing adapter was ligated to the 3' end  
457 of the antisense cDNA. The resulting cDNA was PCR-amplified to about 10–20 ng/µl using a high  
458 fidelity DNA polymerase. The cDNA was purified using the Agencourt AMPure XP kit (Beckman  
459 Coulter Genomics) and was analyzed by capillary electrophoresis. The cDNA pool was sequenced on  
460 an Illumina NextSeq 500 system using 75 bp read length. The read files in FASTQ format were imported  
461 into CLC Genomics Workbench v11 (Qiagen) and trimmed for quality. Reads were mapped to the *S.*  
462 *pneumoniae* reference genome (NCBI accession numbers: NC\_008533.2) using the "bowtie2" tool with  
463 standard parameters and quantified using "featureCounts". Reads counts were normalized using the  
464 median of ratios method from DESeq2 package from R(35). Pearson correlation and Principal  
465 Component Analysis were performed to ascertain the degree of correlation between replicates. Even

466 though replicates #1 and #2 differed from the other three replicates, differential gene expression analysis  
467 could still be conducted. Genes with a |fold change| > 1.5 and an adjusted  $p$ -value < 0.05 were considered  
468 as differentially expressed in the two strains.

469

#### 470 **Extracellular vesicle isolation**

471 For bacterial EVs (Sp-EVs), *S. pneumoniae* strains were grown on a solid blood agar plate overnight  
472 and single colonies were inoculated into full supplemented DMEM media and grown at 37°C in 5%  
473 CO<sub>2</sub>. At mid-logarithmic growth phase, 10 mL aliquots of bacterial culture were taken and centrifuged  
474 (4,000 g, 15 min, 4°C). The pellet was discarded and the supernatant was filtered through a 0.45 µm  
475 pore membrane (Sartorius) twice in order to obtain cell-free supernatant. The resulting cell-free media  
476 was then centrifuged at 100,000 g for 2 h at 4°C using the type 70.1 Ti rotor from Beckam Colter®. The  
477 resulting vesicle pellets were resuspended in 10 mL sterile PBS and the centrifugation step was repeated  
478 for 1 h. Final washed vesicle pellets were resuspended in PBS and stored at -20°C for further analysis.  
479 Additionally, EVs were precipitated using ExoQuick-TC (System Biosciences) according to the  
480 manufacturer's protocol. For subsequent use, EVs were slowly thawed on ice.

481

#### 482 **Scanning Electron Microscopy (SEM)**

483 For SEM, bacteria were grown as described above, and seeded on 12 mm Ø coverslips (Roth®). Cells  
484 were fixed for 1 h in 2.5% (v/v) glutaraldehyde in sodium cacodylate buffer (0.1 M, pH 7.0) and washed  
485 three times with sodium cacodylate buffer for 20 minutes each. Samples were dehydrated in increasing  
486 ethanol concentrations followed by critical point drying using a Leica EM CPD300 Automated Critical  
487 Point Dryer (Leica) and finally coated with gold (25 nm) in a Safematic CCU-010 HV Sputter Coating  
488 System (Safematic). SEM images were acquired at different magnifications in a Zeiss-LEO 1530  
489 Gemini field-emission scanning electron microscope (Carl Zeiss) at 6–8 kV acceleration voltage and a  
490 working distance of 5–7 mm using an InLense secondary electron detector for secondary electron  
491 imaging.

492

#### 493 **Extracellular vesicles counting**

494 Isolated vesicles were counted using a NS300 dynamic light-scattering microscope (Malvern) fitted with  
495 NanoSight NTA 3.2 software. Isolated vesicles were dispersed in 1 mL DPBS and injected through the  
496 microscope at 100 (AU) pump flow rate. Videos were captured at 24 fps for three periods of 60 seconds  
497 for each sample and analyzed using NanoSight NTA 3.2.

498

### 499 **Confocal laser-scanning microscopy of EV and endothelial cell interactions**

500 For characterization studies, HUVECs and Sp-EVs were co-incubated. After isolating Sp-EVs as  
501 described above, vesicles were incubated for 30 minutes at room temperature with 4',6-diamidino-2-  
502 phenylindole, dihydrochloride (DAPI, Biotium®) or DiD (Vibrant™ Cell-Labeling solutions,  
503 Molecular Probes), washed with PBS, and resuspended in growth medium.

504 HUVECs were seeded on 18 mm  $\varnothing$  coverslips in the wells of 24-well plates ( $7 \times 10^4$  cells/well), and  
505 when confluency was reached, cells were washed with DPBS and processed for either immunoblotting  
506 staining or were directly stained with WGA CF®488A (Biotium®) for 30 minutes at 37°C in 5% CO<sub>2</sub>.  
507 For immunoblot staining, HUVECs were first incubated with pre-stained vesicles, blocked (PBS with  
508 0.5% [v/v] Tween20, 0.5% [w/v] Bovine Serum Albumin and 4% [w/v] milk), and further incubated for  
509 1 h at room temperature with FITC-labeled anti-PECAM-1 antibody (Platelet Endothelial Cell Adhesion  
510 Molecule-1, Abcam) diluted 1:1000 in blocking buffer before being washed twice with PBS-T.  
511 Endothelial cells were incubated with pre-stained vesicles for 2 h (adhesion) or 4 h (internalization) at  
512 37°C in 5% CO<sub>2</sub>, and then fixed with 4% (v/v) paraformaldehyde (PFA) for 20 minutes at 4°C. The  
513 imaging was carried out on a Confocal Laser Scanning Microscope (LSM 710, Zeiss®) equipped with  
514 ZEN 2011 software.

515

### 516 **Sample preparation for proteome analysis**

517 Proteins from EVs were extracted with 1% (w/v) SDS in PBS (5 min, 95°C), reduced with 50 mM DTT  
518 (5 min, 95 °C), and diluted with 8 M Urea in 100 mM Tris/HCl, pH 8.0. Buffer exchange and protein  
519 digestion was carried out according to the FASP protocol(80). In brief, the reduced proteins were  
520 transferred to a 30 kDa Microcon filter unit (YM-30 filter units, Millipore) and centrifuged at 14,000 x  
521 g for 20 min in all consecutive steps, and the flow-through was discarded. For washing, 200  $\mu$ L urea

522 buffer (8 M Urea, 100 mM Tris HCL, pH 8.0) was added and the centrifugation was repeated. Aliquots  
523 (100  $\mu$ L) of alkylation solution (0.1 M iodoacetamide in urea buffer) were added, and samples were  
524 incubated for 20 min in the dark and subsequently washed (200  $\mu$ L 8 M urea buffer) after each of two  
525 additional centrifugation steps. Afterwards, samples were centrifuged twice and washed with 200  $\mu$ L 50  
526 mM ammonium bicarbonate buffer, and proteins were digested by the addition of 0.5  $\mu$ g trypsin in 50  
527  $\mu$ L 50 mM ammonium bicarbonate. Proteolytic cleavage was allowed to proceed for 16 h at 37°C and  
528 peptides were eluted by centrifugation. Eluted peptides were dried in a SpeedVac (Thermo Fisher) and  
529 reconstituted by adding 20  $\mu$ L of 0.1% (v/v) formic acid in water.

530

### 531 **Mass spectrometry and statistical analysis**

532 Tryptic peptides were analyzed with a Dionex UHPLC (Thermo Scientific) coupled to an Orbitrap  
533 Fusion ETD (Thermo Scientific). Peptides were loaded onto a trap column (Acclaim PepMap C18) and  
534 separated using a 50 cm analytical column (PepMap RSLC, C18). Full MS1 scans were acquired in the  
535 Orbitrap (m/z range 370–1570, quadrupole isolation) at a resolution of 120,000 (full width at half  
536 maximum) during a 2.5 h, non-linear gradient ranging from 2% to 90% (v/v) acetonitrile/0.1% (v/v)  
537 formic acid. Peptides were fragmented by higher energy collisional dissociation (HCD, 32% collision  
538 energy) and max. 20 fragment ion spectra were acquired per cycle in the ion trap in rapid mode  
539 (quadrupole isolation m/z window = 1.6). The following conditions were used: spray voltage of 2.0 kV,  
540 heated capillary temperature of 275 °C, S-lens RF level = 60%, a maximum automatic gain control  
541 (AGC) value of  $4 \times 10^5$  counts for MS1 with a maximum ion injection time of 50 ms and a maximum  
542 AGC value of  $2 \times 10^3$  for MS2, with a maximum ion accumulation time of 35 ms. A dynamic mass  
543 exclusion time window of 60 s was set with a 10 ppm maximum mass window. All raw files were  
544 searched against reference proteomes of *S. pneumoniae* D39 (version 03.2021) and *Bos taurus* (version  
545 10.2021) with MaxQuant version 1.6.17.0 (Max Planck Institute of Biochemistry, Germany)(81). The  
546 default parameters were used or set as follows: enzyme: trypsin, max. 2 missed cleavages; static  
547 modification: carbamidomethylation of cysteine residues; variable modifications: methionine oxidation;  
548 min. peptide length: 6; max. peptide mass: 7600 Da. Normalization was done in MaxQuant using Label-  
549 Free Quantification (LFQ) min. ratio count = 2 (unique and razor peptides) and matching between runs

550 was enabled. PSM (peptide specific matches) and protein FDR was set to 0.01. LFQ values of all  
551 samples were loaded into Perseus (version 1.6.2.2)(82). The resulting matrix was reduced as proteins  
552 identified as “only identified per site”, ”reverse identified”, and “potential contamination” were  
553 discarded.

#### 554 **Monocyte isolation and co-incubation with EVs**

555 Human monocytes were isolated from the buffy coat of healthy male donors (University Hospital Jena,  
556 German Red Cross). The cells were isolated by density gradient centrifugation. Shortly, 30 mL buffy  
557 coat was diluted with 5 mL DPBS (BioWhittaker®) and carefully poured over 15 mL of Histopaque®  
558 (Merck). After centrifugation (500 g, 20 min, RT, no acceleration break), the peripheral blood  
559 mononuclear cell (PBMC) ring was collected. Cells were washed with DPBS (100 g, 5 min, RT) and a  
560 second density gradient centrifugation step was performed to exclude remaining red blood cells and  
561 neutrophils. Finally, cells were poured over 46% (v/v) Percoll® (Merck) diluted with Iscove’s Modified  
562 Dulbecco’s Medium (IMDM; Thermo Fisher) to remove lymphocytes and re-centrifuged (500 g, 20  
563 min, RT). The monocytes were collected, washed, resuspended in 1 mL IMDM medium supplemented  
564 with 10% (v/v) fetal calf serum (FCS) (termed conditioned medium (CM)), and counted using the cell  
565 counter CASY (OLS®CASY). Subsequently,  $1 \times 10^8$  cells were seeded into a cell culture flask in 15 mL  
566 CM and incubated at 37 °C in 5% CO<sub>2</sub> for 2 h to allow monocyte adherence to the plastic surface.  
567 Afterwards, the cell layer was washed three times with DPBS to remove all non-adherent cells and the  
568 monocytes were incubated overnight at 37 °C in 5% CO<sub>2</sub>.

569 EVs isolated as described above were directly added to the monocyte layer and incubated for 24 h at 37  
570 °C in 5% CO<sub>2</sub> to assess cytokine gene transcription and translation in response to Sp-EVs. Controls for  
571 the assays included zymosan-treated monocytes (100 µg/mL) as the positive control and monocytes in  
572 growth medium as the negative control.

573

#### 574 **Quantitative Real-Time PCR (qRT-PCR) of cytokine genes**

575 Monocytes were challenged with Sp-EVs as described above, after which their total RNA was extracted,  
576 using the Universal RNA Purification Kit (EURx® Roboklon) according to the manufacturer’s  
577 instructions, and quantified using an ND-1000 spectrophotometer (Nanodrop).

578 The expression of genes encoding 18S ribosomal RNA (rRNA), IL-6, IL-1 $\beta$ , TNF- $\alpha$ , monocyte  
579 chemoattractant protein (MCP)-1, C-X-C motif chemokine ligand 10 (CXCL10), and SERPIN E1 was  
580 assessed by qRT-PCR. cDNA was synthesized from 1  $\mu$ g total RNA from each stimulated sample using  
581 High-Capacity cDNA Reverse Transcription Kit (Applied Biosystems) according to the manufacturer's  
582 instructions. Gene expression was quantified on QuantStudio 6 PRO Real-Time PCR System using  
583 PowerUp™ SYBR™ Green Master Mix (Applied Biosystems) and gene-specific primers (**Table S4**).  
584 Relative gene expression levels were normalized against the 18S rRNA housekeeping gene expression  
585 and calculated using the 2- $\Delta\Delta$ Ct method.

586

### 587 **Detection of monocyte cytokine production in response to Sp-EVs**

588 After incubating monocytes with Sp-EVs as described before, cell-free supernatant was collected and a  
589 semiquantitative immunosorbent assessment of cytokine expression was performed using a Proteome  
590 Profiler Human Cytokine Array Kit (R&D Systems) according to the manufacturer's instructions.  
591 Briefly, after blocking, membranes were incubated with the samples and detection antibody cocktail  
592 overnight at 4°C. The membranes were then washed and incubated with streptavidin-horseradish  
593 peroxidase (HRP) at room temperature for 30 minutes, and signals were detected using  
594 chemiluminescent detection reagents (CheLuminate-HRP PicoDetect, PanReac AppliChem). The pixel  
595 density of each spot was measured using the image analysis software Fiji(79). The level of interleukin  
596 (IL)-6 and tumor necrosis factor (TNF)- $\alpha$  was also quantified by Human IL-6 and TNF- $\alpha$  ELISA Kits  
597 (ImmunoTools), respectively.

598

### 599 **Statistical analysis**

600 Unless otherwise stated, statistical significance was determined by ordinary one-way analysis of  
601 variance (ANOVA) test with a Bonferroni multiple comparisons test. Probability values (*p*-values) were  
602 defined as follows: ns, \*,  $p \leq 0.05$ ; \*\*,  $p \leq 0.01$ ; \*\*\*,  $p \leq 0.001$ ; \*\*\*\*,  $p \leq 0.0001$ .

603



604 **Acknowledgements**

605 The work of the authors is supported by the Collaborative Research Center, FungiNet (project C6 (PFZ))  
606 Deutsche Forschungsgemeinschaft (DFG). SH received funding by the Deutsche  
607 Forschungsgemeinschaft DFG HA 3125/5-2 and DFG-GRK 2719.

608 We thank the Microverse Imaging Center for providing microscope facility support for data acquisition.  
609 The ELYRA 7 was funded by the Free State of Thuringia with grant number 2019 FGI 0003. The  
610 Microverse Imaging Center is funded by the Deutsche Forschungsgemeinschaft (DFG, German  
611 Research Foundation) under Germany's Excellence Strategy - EXC 2051 - Project-ID 390713860.

612

613 **Author Contributions**

614 MB and CV conceived and designed the experiments. MB, LT, LZ, SL and MMM performed the  
615 experiments. MB, CV, BH, YB, LT, LZ and MMM analyzed the data. MW, AJ, HS, SH, MTF and PZ  
616 contributed with reagents, materials, and analysis tools. CV, MB, BH, YB, MMM and PZ wrote the  
617 manuscript. CV, MW, AJ, HS, SH, MTF and PZ corrected the manuscript.

618 **Conflict of Interest**

619 The authors declare that the research was conducted in the absence of any commercial or financial  
620 relationships that could be construed as a potential conflict of interest.

621

622

623 **References**

624

- 625 1. Loirat C, Frémeaux-Bacchi V. 2011. Atypical hemolytic uremic syndrome. *Orphanet J*  
626 *Rare Dis* 6:60.
- 627 2. Joseph C, Gattineni J. 2013. Complement disorders and hemolytic uremic syndrome.  
628 *Curr Opin Pediatr* <https://doi.org/10.1097/MOP.0b013e32835df48a>.
- 629 3. Zipfel PF, Lauer N. 2013. Defective complement action and control defines disease  
630 pathology for retinal and renal disorders and provides a basis for new therapeutic  
631 approaches *Advances in Experimental Medicine and Biology*.
- 632 4. Fischer K, Poschmann A, Oster H. 1971. Sever pneumoniae with hemolysis caused by  
633 neu raminidase. Detection of cryptoantigens by indirect immunofluorescent technic.  
634 *Monatsschreiben Kinderheilkunde* 2–8.
- 635 5. Agarwal HS, Latifi SQ. 2021. Streptococcus pneumoniae-associated hemolytic uremic  
636 syndrome in the era of pneumococcal vaccine. *Pathogens* 10.
- 637 6. Groves AP, Reich P, Sigdel B, Davis TK. 2016. Pneumococcal hemolytic uremic  
638 syndrome and steroid resistant nephrotic syndrome. *Clin Kidney J* 9:572–575.
- 639 7. Copelovitch L, Kaplan BS. 2008. Streptococcus pneumoniae-associated hemolytic  
640 uremic syndrome. *Pediatric Nephrology* <https://doi.org/10.1007/s00467-007-0518-y>.
- 641 8. Daniels CC, Rogers PD, Shelton CM. 2016. A review of pneumococcal vaccines: Current  
642 polysaccharide vaccine recommendations and future protein antigens. *Journal of*  
643 *Pediatric Pharmacology and Therapeutics* <https://doi.org/10.5863/1551-6776-21.1.27>.
- 644 9. McAllister DA, Liu L, Shi T, Chu Y, Reed C, Burrows J, Adeloje D, Rudan I, Black RE,  
645 Campbell H, Nair H. 2019. Global, regional, and national estimates of pneumonia  
646 morbidity and mortality in children younger than 5 years between 2000 and 2015: a  
647 systematic analysis. *Lancet Glob Health* 7:e47–e57.
- 648 10. Muralinath M, Kuehn MJ, Roland KL, Curtiss R. 2011. Immunization with Salmonella  
649 enterica serovar typhimurium-derived outer membrane vesicles delivering the  
650 pneumococcal protein PspA confers protection against challenge with Streptococcus  
651 pneumoniae. *Infect Immun* 79.
- 652 11. Mehanny M, Boese A, Bornamehr B, Hoppstädter J, Presser V, Kiemer AK, Lehr C-M,  
653 Fuhrmann G. 2022. Spray-dried pneumococcal membrane vesicles are promising  
654 candidates for pulmonary immunization. *Int J Pharm* 621:121794.
- 655 12. Parveen S, Subramanian K. 2022. Emerging Roles of Extracellular Vesicles in  
656 Pneumococcal Infections: Immunomodulators to Potential Novel Vaccine Candidates.  
657 *Front Cell Infect Microbiol* 12:1–8.

- 658 13. Narciso AR, Iovino F, Thorsdottir S, Mellroth P, Codemo M, Spoerry C, Righetti F,  
659 Muschiol S, Normark S, Nannapaneni P, Henriques-Normark B. 2022. Membrane  
660 particles evoke a serotype-independent cross-protection against pneumococcal  
661 infection that is dependent on the conserved lipoproteins MalX and PrsA. *Proc Natl*  
662 *Acad Sci U S A* 119:1–11.
- 663 14. Olaya-Abril A, Prados-Rosales R, McConnell MJ, Martín-Peña R, González-Reyes JA,  
664 Jiménez-Munguía I, Gómez-Gascón L, Fernández J, Luque-García JL, García-Lidón C,  
665 Estévez H, Pachón J, Obando I, Casadevall A, Pirofski L, Rodríguez-Ortega MJ.  
666 2014. Characterization of protective extracellular membrane-derived vesicles  
667 produced by *Streptococcus pneumoniae*. *J Proteomics* 106:46–60.
- 668 15. Mehanny M, Kroniger T, Koch M, Hoppstädter J, Becher D, Kiemer AK, Lehr CM,  
669 Fuhrmann G. 2022. Yields and Immunomodulatory Effects of Pneumococcal  
670 Membrane Vesicles Differ with the Bacterial Growth Phase. *Adv Healthc Mater* 11:1–  
671 16.
- 672 16. Olaya-Abril A, Prados-Rosales R, González-Reyes JA, Casadevall A, Pirofski LA,  
673 Rodríguez-Ortega MJ. 2021. Extracellular vesicles from different pneumococcal  
674 serotypes are internalized by macrophages and induce host immune responses.  
675 *Pathogens* 10.
- 676 17. Codemo M, Muschiol S, Iovino F, Nannapaneni P, Plant L, Wai SN, Henriques-Normark  
677 B. 2018. Immunomodulatory effects of pneumococcal extracellular vesicles on cellular  
678 and humoral host defenses. *mBio* 9:1–15.
- 679 18. Yerneni SS, Werner S, Azambuja JH, Ludwig N, Eutsey R, Lucas PC, Bailey N, Whiteside  
680 TL, Campbell PG, Hiller NL, Aggarwal SD. 2021. Pneumococcal extracellular vesicles  
681 modulate host immunity. *mBio* 12.
- 682 19. Erdbrügger U, Le TH. 2016. Extracellular Vesicles in Renal Diseases: More than Novel  
683 Biomarkers? *Journal of the American Society of Nephrology* 27:12–26.
- 684 20. Zhou H, Pisitkun T, Aponte A, Yuen PST, Hoffert JD, Yasuda H, Hu X, Chawla L, Shen RF,  
685 Knepper MA, Star RA. 2006. Exosomal Fetuin-A identified by proteomics: A novel  
686 urinary biomarker for detecting acute kidney injury. *Kidney Int* 70:1847–1857.
- 687 21. Daniel L, Fakhouri F, Joly D, Mouthon L, Nusbaum P, Grunfeld JP, Schifferli J, Guillemin  
688 L, Lesavre P, Halbwachs-Mecarelli L. 2006. Increase of circulating neutrophil and  
689 platelet microparticles during acute vasculitis and hemodialysis. *Kidney Int* 69:1416–  
690 1423.
- 691 22. Burger D, Thibodeau JF, Holterman CE, Burns KD, Touyz RM, Kennedy CRJ. 2014.  
692 Urinary podocyte microparticles identify prealbuminuric diabetic glomerular injury.  
693 *Journal of the American Society of Nephrology* 25:1401–1407.
- 694 23. Boulanger CM, Amabile N, Guérin AP, Pannier B, Leroyer AS, Nguyen C, Mallat Z,  
695 Tedgui A, London GM. 2007. In vivo shear stress determines circulating levels of  
696 endothelial microparticles in end-stage renal disease. *Hypertension* 49:902–908.

- 697 24. Arvidsson I, Ståhl A, Manea Hedström M, Kristoffersson A-C, Rylander C, Westman JS,  
698 Storry JR, Olsson ML, Karpman D. 2015. Shiga Toxin–Induced Complement-Mediated  
699 Hemolysis and Release of Complement-Coated Red Blood Cell–Derived Microvesicles  
700 in Hemolytic Uremic Syndrome. *The Journal of Immunology* 194.
- 701 25. Ståhl AL, Sartz L, Nelson A, Békássy ZD, Karpman D. 2009. Shiga toxin and  
702 lipopolysaccharide induce platelet-leukocyte aggregates and tissue factor release, a  
703 thrombotic mechanism in hemolytic uremic syndrome. *PLoS One* 4.
- 704 26. Ge S, Hertel B, Emden SH, Beneke J, Menne J, Haller H, Von Vietinghoff S. 2012.  
705 Microparticle generation and leucocyte death in Shiga toxin-mediated HUS.  
706 *Nephrology Dialysis Transplantation* 27:2768–2775.
- 707 27. Bruyand M, Mariani-Kurkdjian P, Gouali M, de Valk H, King LA, le Hello S, Bonacorsi S,  
708 Loirat C. 2018. Hemolytic uremic syndrome due to Shiga toxin-producing *Escherichia*  
709 *coli* infection. *Med Mal Infect* <https://doi.org/10.1016/j.medmal.2017.09.012>.
- 710 28. McDevitt E, Khan F, Scasny A, Thompson CD, Eichenbaum Z, McDaniel LS, Vidal JE.  
711 2020. Hydrogen Peroxide Production by *Streptococcus pneumoniae* Results in Alpha-  
712 hemolysis by Oxidation of Oxy-hemoglobin to Met-hemoglobin. *mSphere*  
713 <https://doi.org/10.1128/msphere.01117-20>.
- 714 29. Rai P, Parrish M, Tay IJJ, Li N, Ackerman S, He F, Kwang J, Chow VT, Engelward BP.  
715 2015. *Streptococcus pneumoniae* secretes hydrogen peroxide leading to DNA damage  
716 and apoptosis in lung cells. *Proc Natl Acad Sci U S A*  
717 <https://doi.org/10.1073/pnas.1424144112>.
- 718 30. Du S, Vilhena C, Hammerschmidt S, Skerka C, Zipfel PF. 2021. Sequence analysis of the  
719 immune evasion of *Streptococcus pneumoniae* PspA.
- 720 31. Du S, Vilhena C, Fuest D, Slevogt H, Hammerschmidt S, Skerka C, Zipfel PF. 2022.  
721 Elucidation of domain composition diversity of PspA from *Streptococcus pneumoniae*:  
722 towards molecule typing of clinical strains. In preparation.
- 723 32. Donlan RM, Piede JA, Heyes CD, Sanii L, Murga R, Edmonds P, El-Sayed I, El-Sayed MA.  
724 2004. Model system for growing and quantifying *Streptococcus pneumoniae* biofilms  
725 in situ and in real time. *Appl Environ Microbiol*  
726 <https://doi.org/10.1128/AEM.70.8.4980-4988.2004>.
- 727 33. Präbst K, Engelhardt H, Ringgeler S, Hübner H. 2017. Basic colorimetric proliferation  
728 assays: MTT, WST, and resazurin *Methods in Molecular Biology*.
- 729 34. Gerst R, Cseresnyés Z, Figge MT. 2023. JIPipe: visual batch processing for ImageJ. *Nat*  
730 *Methods* <https://doi.org/10.1038/s41592-022-01744-4>.
- 731 35. Love MI, Huber W, Anders S. 2014. Moderated estimation of fold change and  
732 dispersion for RNA-seq data with DESeq2. *Genome Biol* 15.

- 733 36. Codemo M, Muschiol S, Iovino F, Nannapaneni P, Plant L, Wai SN, Henriques-Normark  
734 B. 2018. Immunomodulatory effects of pneumococcal extracellular vesicles on cellular  
735 and humoral host defenses. *mBio* 9:1–15.
- 736 37. Grande R, Celia C, Mincione G, Stringaro A, Di Marzio L, Colone M, Di Marcantonio MC,  
737 Savino L, Puca V, Santoliquido R, Locatelli M, Muraro R, Hall-Stoodley L, Stoodley P.  
738 2017. Detection and physicochemical characterization of membrane vesicles (MVs) of  
739 *Lactobacillus reuteri* DSM 17938. *Front Microbiol* 8.
- 740 38. Ellis TN, Kuehn MJ. 2010. Virulence and Immunomodulatory Roles of Bacterial Outer  
741 Membrane Vesicles. *Microbiology and Molecular Biology Reviews* 74:81–94.
- 742 39. Kim KW. 2018. Visualization of Extracellular Vesicles of Prokaryotes and Eukaryotic  
743 Microbes. *Appl Microsc* 48:96–101.
- 744 40. Olaya-Abril A, Prados-Rosales R, McConnell MJ, Martín-Peña R, González-Reyes JA,  
745 Jiménez-Munguía I, Gómez-Gascón L, Fernández J, Luque-García JL, García-Lidón C,  
746 Estévez H, Pachón J, Obando I, Casadevall A, Pirofski L, Anne, Rodríguez-Ortega MJ.  
747 2014. Characterization of protective extracellular membrane-derived vesicles  
748 produced by *Streptococcus pneumoniae*. *J Proteomics* 106:46–60.
- 749 41. Lu YJ, Rock CO. 2006. Transcriptional regulation of fatty acid biosynthesis in  
750 *Streptococcus pneumoniae*. *Mol Microbiol* 59.
- 751 42. Paixão L, Oliveira J, Veríssimo A, Vinga S, Lourenço EC, Ventura MR, Kjos M, Veening  
752 JW, Fernandes VE, Andrew PW, Yesilkaya H, Neves AR. 2015. Host glycan sugar-specific  
753 pathways in *Streptococcus pneumoniae*: Galactose as a key sugar in colonisation and  
754 infection. *PLoS One* 10.
- 755 43. Troxler LJ, Werren JP, Schaffner TO, Mostacci N, Vermathen P, Vermathen M, Wüthrich  
756 D, Simillion C, Brugger SD, Bruggmann R, Hathaway LJ, Furrer J, Hilty M. 2019. Carbon  
757 source regulates polysaccharide capsule biosynthesis in *Streptococcus pneumoniae*.  
758 *Journal of Biological Chemistry* 294.
- 759 44. Quin LR, Moore QC, McDaniel LS. 2007. Pneumolysin, PspA, and PspC contribute to  
760 pneumococcal evasion of early innate immune responses during bacteremia in mice.  
761 *Infect Immun* 75:2067–2070.
- 762 45. Vilhena C, Du S, Battista M, Westermann M, Kohler TP, Hammerschmidt S, Zipfel PF.  
763 2022. The choline-binding proteins PspA, PspC and LytA of *Streptococcus pneumoniae*  
764 and their role on host cellular adhesion and damage. *bioRxiv*.
- 765 46. Martinez PJ, Farhan A, Mustafa M, Javaid N, Darkoh C, Garrido-Sanabria E, Fisher-Hoch  
766 SP, Briles DE, Kantarci A, Mirza S. 2019. PspA facilitates evasion of pneumococci from  
767 bactericidal activity of neutrophil extracellular traps (NETs). *Microb Pathog* 103653.
- 768 47. Lovelace MD, Yap ML, Yip J, Muller W, Wijburg O, Jackson DE. 2013. Absence of  
769 platelet endothelial cell adhesion molecule 1, PECAM-1/ CD31, in vivo increases

- 770 resistance to salmonella enterica serovar typhimurium in mice. *Infect Immun* 81:1952–  
771 1963.
- 772 48. Bruggisser J, Tarek B, Wyder M, Müller P, von Ballmoos C, Witz G, Enzmann G, Deutsch  
773 U, Engelhardt B, Posthaus H. 2020. CD31 (PECAM-1) Serves as the Endothelial Cell-  
774 Specific Receptor of *Clostridium perfringens*  $\beta$ -Toxin. *Cell Host Microbe* 28:69-78.e6.
- 775 49. Iovino F, Molema G, Bijlsma JJE. 2014. Platelet endothelial cell adhesion molecule-1, a  
776 putative receptor for the adhesion of *Streptococcus pneumoniae* to the vascular  
777 endothelium of the blood-brain barrier. *Infect Immun*  
778 <https://doi.org/10.1128/IAI.00046-14>.
- 779 50. Huang ST, Lin CL, Chang YJ, Sher YP, Wu MJ, Shu KH, Sung FC, Kao CH. 2014.  
780 Pneumococcal pneumonia infection is associated with end-stage renal disease in adult  
781 hospitalized patients. *Kidney Int* 86:1023–1030.
- 782 51. Piastra M, Tempera A, Luca E, Buffone E, Cafforio C, Briganti V, Genovese O, Marano  
783 M, Rigante D. 2016. Kidney injury owing to *Streptococcus pneumoniae* infection in  
784 critically ill infants and children: report of four cases. *Paediatr Int Child Health* 36.
- 785 52. Spinale JM, Ruebner RL, Kaplan BS, Copelovitch L. 2013. Update on *Streptococcus*  
786 *pneumoniae* associated hemolytic uremic syndrome. *Curr Opin Pediatr*  
787 <https://doi.org/10.1097/MOP.0b013e32835d7f2c>.
- 788 53. Coats MT, Murphy T, Paton JC, Gray B, Briles DE. 2011. Exposure of Thomsen-  
789 Friedenreich antigen in *Streptococcus pneumoniae* infection is dependent on  
790 pneumococcal neuraminidase A. *Microb Pathog* 50.
- 791 54. Orihuela CJ, Radin JN, Sublett JE, Gao G, Kaushal D, Tuomanen EI. 2004. Microarray  
792 analysis of pneumococcal gene expression during invasive disease. *Infect Immun* 72.
- 793 55. Lisher JP, Tsui H-CT, Ramos-Montañez S, Hentchel KL, Martin JE, Trinidad JC, Winkler  
794 ME, Giedroc DP. 2017. Biological and Chemical Adaptation to Endogenous Hydrogen  
795 Peroxide Production in *Streptococcus pneumoniae* D39. *mSphere* 2.
- 796 56. Bortoni ME, Terra VS, Hinds J, Andrew PW, Yesilkaya H. 2009. The pneumococcal  
797 response to oxidative stress includes a role for Rgg. *Microbiology (N Y)* 155.
- 798 57. Ning K, Fermin D, Nesvizhskii AI. 2012. Comparative analysis of different label-free  
799 mass spectrometry based protein abundance estimates and their correlation with  
800 RNA-Seq gene expression data. *J Proteome Res* 11.
- 801 58. Ståhl A, Ie, Arvidsson I, Johansson KE, Chromek M, Rebetz J, Loos S, Kristofferson AC,  
802 Békássy ZD, Mörgelin M, Karpman D. 2015. A Novel Mechanism of Bacterial Toxin  
803 Transfer within Host Blood Cell-Derived Microvesicles. *PLoS Pathog* 11.
- 804 59. Jhelum H, Sori H, Sehgal D. 2018. A novel extracellular vesicle-associated  
805 endodeoxyribonuclease helps *Streptococcus pneumoniae* evade neutrophil  
806 extracellular traps and is required for full virulence. *Sci Rep* 8:1–17.

- 807 60. Willms E, Cabañas C, Mäger I, Wood MJA, Vader P. 2018. Extracellular vesicle  
808 heterogeneity: Subpopulations, isolation techniques, and diverse functions in cancer  
809 progression. *Front Immunol* <https://doi.org/10.3389/fimmu.2018.00738>.
- 810 61. Zhang H, Freitas D, Kim HS, Fabijanic K, Li Z, Chen H, Mark MT, Molina H, Martin AB,  
811 Bojmar L, Fang J, Rampersaud S, Hoshino A, Matei I, Kenific CM, Nakajima M, Mutvei  
812 AP, Sansone P, Buehring W, Wang H, Jimenez JP, Cohen-Gould L, Paknejad N, Brendel  
813 M, Manova-Todorova K, Magalhães A, Ferreira JA, Osório H, Silva AM, Massey A,  
814 Cubillos-Ruiz JR, Galletti G, Giannakakou P, Cuervo AM, Blenis J, Schwartz R, Brady MS,  
815 Peinado H, Bromberg J, Matsui H, Reis CA, Lyden D. 2018. Identification of distinct  
816 nanoparticles and subsets of extracellular vesicles by asymmetric flow field-flow  
817 fractionation. *Nat Cell Biol* 20.
- 818 62. Paixão L, Caldas J, Kloosterman TG, Kuipers OP, Vinga S, Neves AR. 2015.  
819 Transcriptional and metabolic effects of glucose on *Streptococcus pneumoniae* sugar  
820 metabolism. *Front Microbiol* 6.
- 821 63. Kawada-Matsuo M, Oogai Y, Komatsuzawa H. 2017. Sugar allocation to metabolic  
822 pathways is tightly regulated and affects the virulence of *Streptococcus mutans*. *Genes*  
823 (Basel) <https://doi.org/10.3390/genes8010011>.
- 824 64. Greenawalt JW, Whiteside TL. 1975. Mesosomes: membranous bacterial organelles.  
825 *Bacteriol Rev* 39:405–463.
- 826 65. Sokol CL, Luster AD. 2015. The chemokine system in innate immunity. *Cold Spring Harb*  
827 *Perspect Biol* 7.
- 828 66. Palomino DC arolina T, Marti LC avalheiro. 2015. Chemokines and immunity. *Einstein*  
829 (Sao Paulo) <https://doi.org/10.1590/S1679-45082015RB3438>.
- 830 67. Tanaka T, Narazaki M, Kishimoto T. 2014. Il-6 in inflammation, Immunity, And disease.  
831 *Cold Spring Harb Perspect Biol* 6.
- 832 68. Mehanny M, Koch M, Lehr CM, Fuhrmann G. 2020. Streptococcal Extracellular  
833 Membrane Vesicles Are Rapidly Internalized by Immune Cells and Alter Their Cytokine  
834 Release. *Front Immunol* 11:1–13.
- 835 69. Choi CW, Park EC, Yun SH, Lee SY, Kim S il, Kim GH. 2017. Potential Usefulness of  
836 *Streptococcus pneumoniae* Extracellular Membrane Vesicles as Antibacterial Vaccines.  
837 *J Immunol Res* 2017.
- 838 70. Kuipers K, Daleke-Schermerhorn MH, Jong WSP, ten Hagen-Jongman CM, van  
839 Opzeeland F, Simonetti E, Luirink J, de Jonge MI. 2015. Salmonella outer membrane  
840 vesicles displaying high densities of pneumococcal antigen at the surface offer  
841 protection against colonization. *Vaccine* 33:2022–2029.
- 842 71. van Beek LF, Surmann K, van den Berg van Saparoea HB, Houben D, Jong WSP,  
843 Hentschker C, Ederveen THA, Mitsi E, Ferreira DM, van Opzeeland F, van der Gaast–de  
844 Jongh CE, Joosten I, Völker U, Schmidt F, Luirink J, Diavatopoulos DA, de Jonge MI.

- 845 2020. Exploring metal availability in the natural niche of *Streptococcus pneumoniae* to  
846 discover potential vaccine antigens. *Virulence* 11.
- 847 72. Hicks LA, Harrison LH, Flannery B, Hadler JL, Schaffner W, Craig AS, Jackson D, Thomas  
848 A, Beall B, Lynfield R, Reingold A, Farley MM, Whitney CG. 2007. Incidence of  
849 pneumococcal disease due to non- pneumococcal conjugate vaccine (PCV7) serotypes  
850 in the United States during the era of widespread PCV7 vaccination, 1998-2004.  
851 *Journal of Infectious Diseases* 196.
- 852 73. Feikin DR, Kagucia EW, Loo JD, Link-Gelles R, Puhon MA, Cherian T, Levine OS, Whitney  
853 CG, O'Brien KL, Moore MR, Feikin DR, Link-Gelles R, Cherian T, Adegbola RA, Agocs M,  
854 Ampofo K, Andrews N, Barton T, Benito J, Broome C v., Bruce MG, Bulkow LR, Byington  
855 CL, Camou T, Cook H, Cotter S, Dagan R, de Wals P, Deceuninck G, Denham B, Edwards  
856 G, Eskola J, Fitzgerald M, Galanakis E, Garcia-Gabarrot G, Garcia-Garcia JJ, Gene A,  
857 Gomez B, Heffernan H, Hennessy TW, Heuberger S, Hilty M, Ingels H, Jayasinghe S,  
858 Kagucia EW, Kellner JD, Klein NP, Kormann-Klement A, Kozakova J, Krause V, Kriz P,  
859 Lambertsen L, Lepoutre A, Levine OS, Lipsitch M, Loo JD, Lopez-Vega M, Lovgren M,  
860 Maraki S, Mason EO, McIntyre PB, Menzies R, Messina A, Miller E, Mintegi S, Moore  
861 MR, Motlova J, Moulton LH, Mühlemann K, Muñoz-Almagro C, O'Brien KL, Murdoch  
862 DR, Park DE, Puhon MA, Reingold AL, Sa-Leao R, Sanyal A, Smith PG, Spanjaard L,  
863 Techasaensiri C, Thompson RE, Thoon KC, Tyrrell GJ, Valentiner-Branth P, van der Ende  
864 A, Vanderkooi OG, van der Linden MPG, Varon E, Verhaegen J, Vestrheim DF, Vickers I,  
865 von Gottberg A, von Kries R, Waight P, Weatherholtz R, Weiss S, Whitney CG, Yee A,  
866 Zaidi AKM. 2013. Serotype-Specific Changes in Invasive Pneumococcal Disease after  
867 Pneumococcal Conjugate Vaccine Introduction: A Pooled Analysis of Multiple  
868 Surveillance Sites. *PLoS Med* 10.
- 869 74. <https://www.cdc.gov/pneumococcal/clinicians/streptococcus-pneumoniae.html>. CDC.
- 870 75. Banerjee R, Hersh AL, Newland J, Beekmann SE, Polgreen PM, Bender J, Shaw J,  
871 Copelovitch L, Kaplan BS, Shah SS. 2011. *Streptococcus pneumoniae*-associated  
872 hemolytic uremic syndrome among children in North America. *Pediatric Infectious  
873 Disease Journal* 30.
- 874 76. Makwana A, Sheppard C, Fry NK, Ladhani SN. 2019. Pneumococcal-related Hemolytic  
875 Uremic Syndrome in the United Kingdom: National Surveillance, 2006-2016. *Pediatric  
876 Infectious Disease Journal* 38.
- 877 77. Brito DA, Ramirez M, de Lencastre H. 2003. Serotyping *Streptococcus pneumoniae* by  
878 multiplex PCR. *J Clin Microbiol* 41.
- 879 78. Lanie JA, Ng WL, Kazmierczak KM, Andrzejewski TM, Davidsen TM, Wayne KJ, Tettelin  
880 H, Glass JI, Winkler ME. 2007. Genome sequence of Avery's virulent serotype 2 strain  
881 D39 of *Streptococcus pneumoniae* and comparison with that of unencapsulated  
882 laboratory strain R6. *J Bacteriol* 189:38–51.
- 883 79. Schindelin J, Arganda-Carreras I, Frise E, Kaynig V, Longair M, Pietzsch T, Preibisch S,  
884 Rueden C, Saalfeld S, Schmid B, Tinevez J-Y, White DJ, Hartenstein V, Eliceiri K,



- 885 Tomancak P, Cardona A. 2012. Fiji: an open-source platform for biological-image  
886 analysis. *Nat Methods* 9:676–82.
- 887 80. Wiśniewski JR, Zougman A, Nagaraj N, Mann M. 2009. Universal sample preparation  
888 method for proteome analysis. *Nat Methods* 6.
- 889 81. Cox J, Mann M. 2008. MaxQuant enables high peptide identification rates,  
890 individualized p.p.b.-range mass accuracies and proteome-wide protein quantification.  
891 *Nat Biotechnol* 26.
- 892 82. Tyanova S, Temu T, Sinitcyn P, Carlson A, Hein MY, Geiger T, Mann M, Cox J. 2016. The  
893 Perseus computational platform for comprehensive analysis of (prote)omics data. *Nat*  
894 *Methods* <https://doi.org/10.1038/nmeth.3901>.
- 895

896 **Figures and Figure Legends**  
**Figure 1**

897

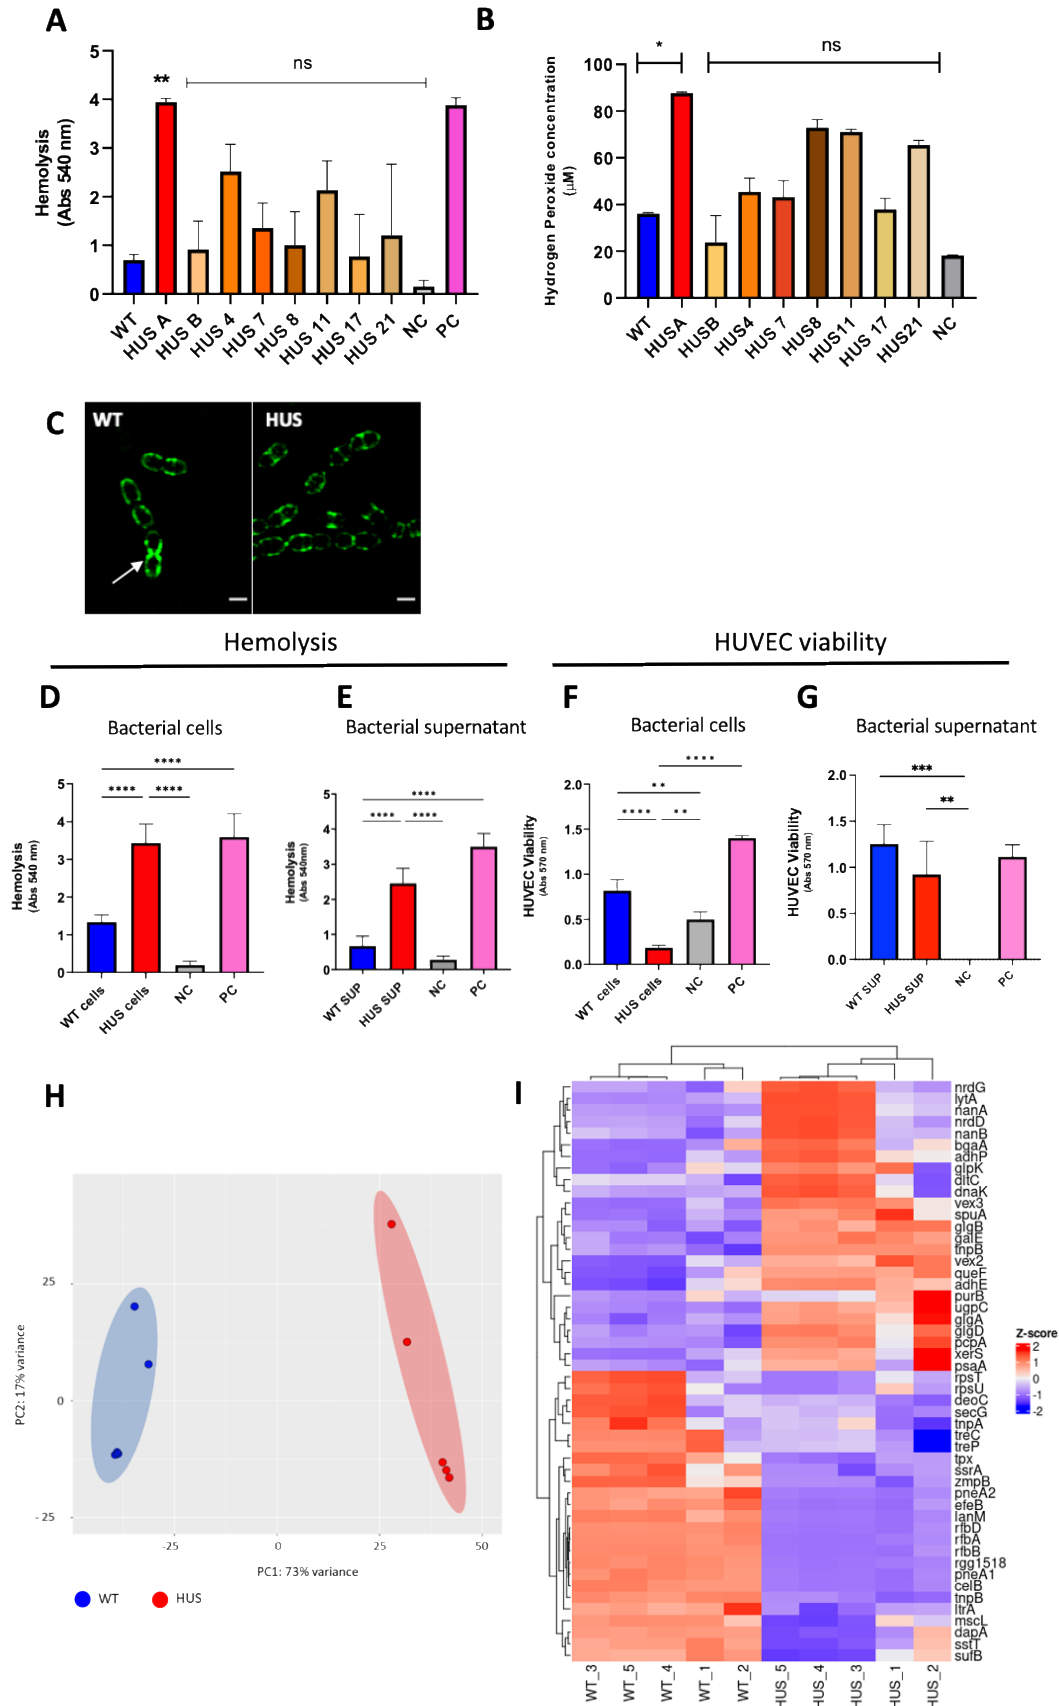

898

899 **Figure 1. Sp-HUS strains and supernatant-mediated damage on human red blood cells and**  
900 **endothelia.** Eight Sp-HUS strains (HUS A, B, 4, 7, 8, 11, 17 and 21) were assayed for their capacity to  
901 hemolyze human red blood cells (**A**). Red blood cells from healthy donors, were incubated with mid-  
902 exponentially grown bacterial cells at 37°C. PBS and bi-distilled water served as negative and positive  
903 controls, respectively. The absorbance of the supernatants was measured at 540 nm. Mean  $\pm$  SD (**B**)  
904 Released hydrogen peroxide was quantified on the supernatant of the same strains. Bacterial cultures  
905 were harvested at mid-exponential phase, centrifuged and the supernatant immediately assayed for the  
906 presence of hydrogen peroxide using a commercial kit. (**C**) Representative SR-SIM images of WT and  
907 Sp-HUS strains stained with WGA-488. Scale bar is 1  $\mu$ m. Cellular (**D**) and supernatant fractions (**E**)  
908 of selected strains were tested separately for their hemolytic capacity. (**F**) HUVECs viability was  
909 evaluated after incubation with WT or Sp-HUS strains or the corresponding supernatant fractions (**G**)  
910 by CTB assay. Tert-butyl hydroperoxide (400  $\mu$ M) and DMEM were used as negative (grey bar) and  
911 positive (pink bar) controls, respectively. (**H**) PCA plot of bacterial transcriptome from RNAseq  
912 analysis. (**I**) Heatmap of differentially expressed genes from the RNAseq analysis of five replicates of  
913 WT and Sp-HUS bacteria highlighting upregulated (red) and downregulated (blue) genes in the Sp-HUS  
914 strain.

## Figure 2

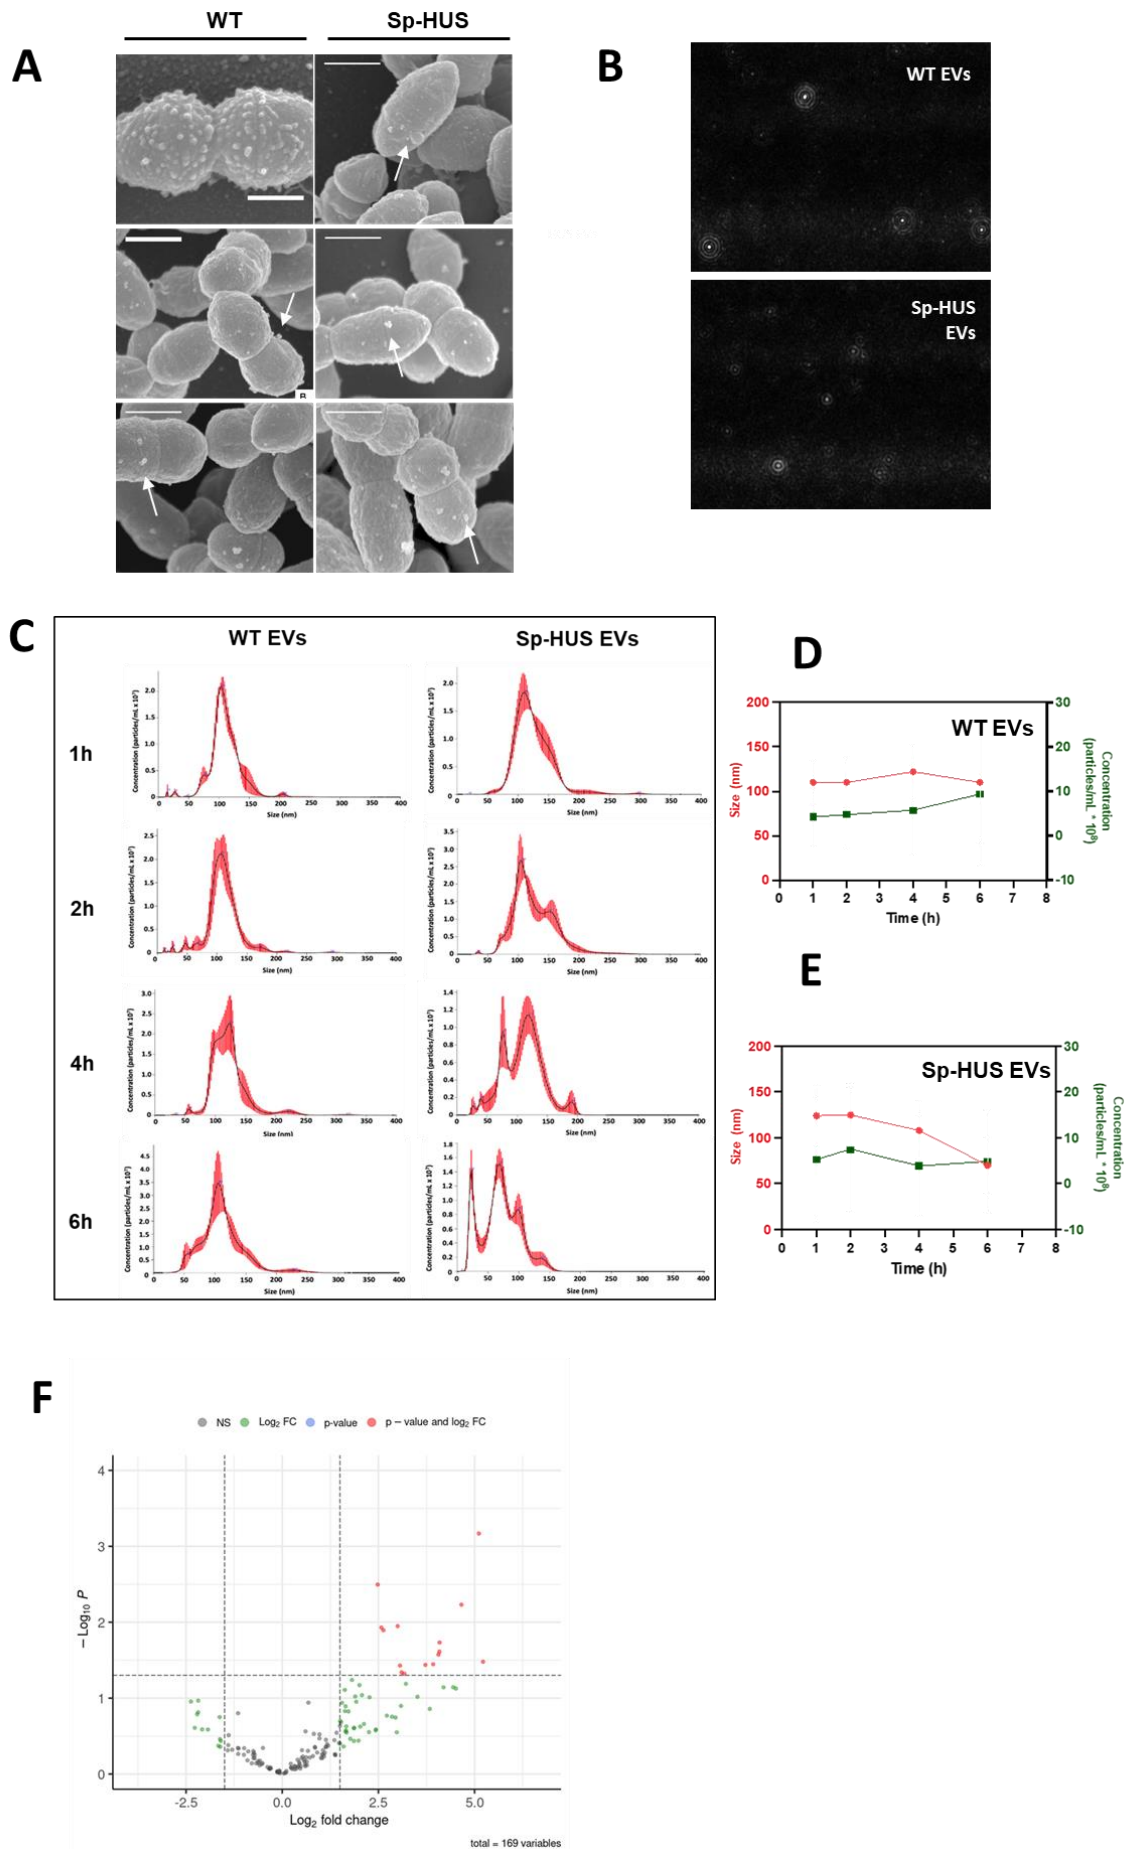

916 **Figure 2. Characterization of pneumococcal EVs.** (A) Representative SEM images of *S. pneumoniae*  
917 strains during shedding of EVs (arrows). Scale bar = 560 nm. (B) Representative snapshots of WT and  
918 Sp-HUS EVs, visualized by light scattering microscopy. (C) Histograms of EVs concentration  
919 (particles/mL x 10<sup>7</sup>) and size (nm), after nanoparticle tracking analysis. EVs were isolated from WT or  
920 Sp-HUS supernatant at different time points of growth (1, 2, 4 and 6 hours). (D, E) Sum up graphs  
921 showing WT (D) and Sp-HUS (E) EVs size (nm) (red line) and concentration (particles/mL x 10<sup>8</sup>) (green  
922 line) over time. (F) Proteomic analysis of pneumococcal EVs cargo. The proteome of Sp-HUS EVs  
923 fraction was compared to the proteome of WT EVs. Fold changes in protein levels are represented as  
924 the log<sub>2</sub> ratio of Sp-HUS EVs and WT EVs (log<sub>2</sub>(FoldChange)), while the significance of these changes  
925 is represented by the negative logarithm of the p-value of a *t* test corrected for multiple comparisons (-  
926 log<sub>10</sub> - *P* value). Significantly upregulated proteins of HUS-EVs compared to WT EVs are shown in red.

927

928

929

930

## Figure 3

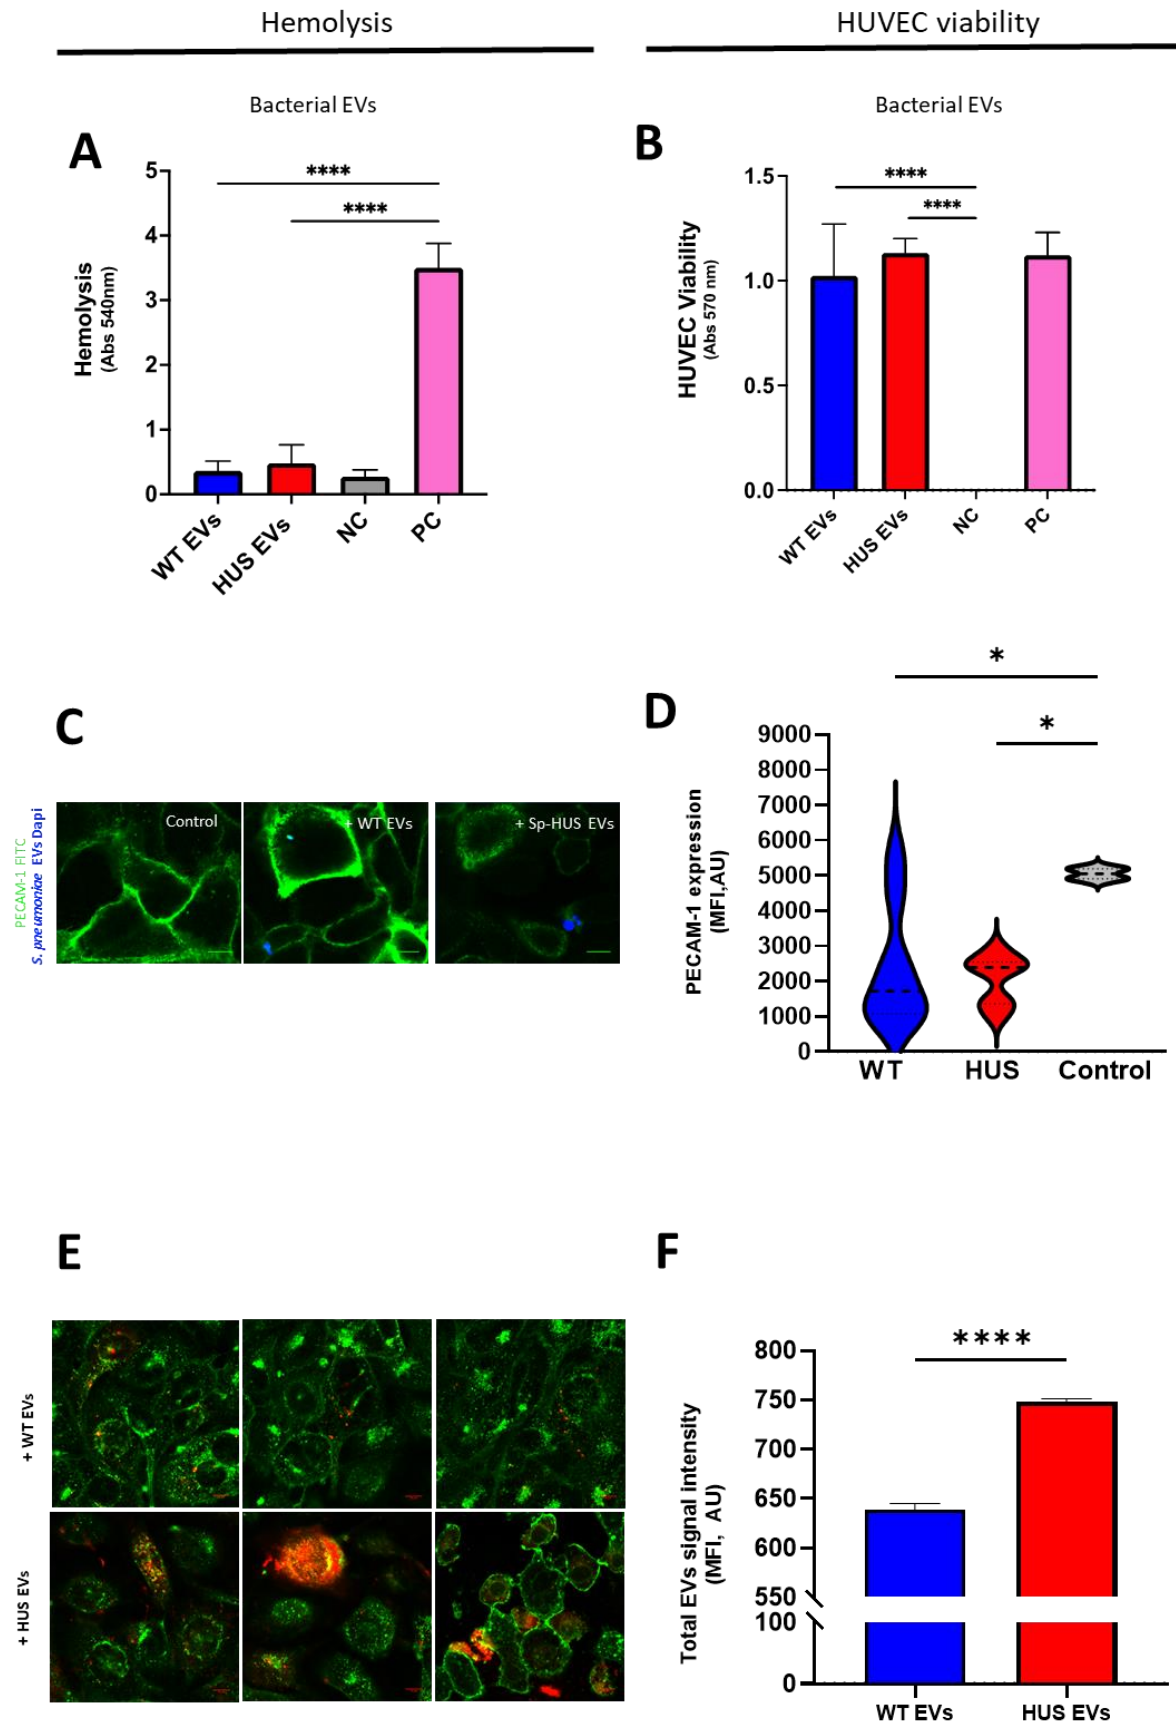

931 **Figure 3. Sp-HUS EVs host-cellular interactions.** (A) The hemolytic activity of WT and Sp-HUS EVs  
932 was tested on human red blood cells, similarly to Fig. 1A. (B) HUVECs viability was evaluated after  
933 incubation with WT or Sp-HUS EVs by CTB assay, in a similar fashion as Fig. 1C. (C) Representative  
934 CLSM images of endothelial cells (FITC-labelled anti-PECAM-1 antibody, green) interaction with WT  
935 or Sp-HUS EVs (pre-stained with DAPI, blue). HUVECs in growth medium (DMEM) were taken as  
936 control. Scale bar = 10  $\mu$ m. (D) Violin plots of the fluorescence intensity of PECAM-1 signal (green)  
937 expressed in arbitrary units (AU). (E) Representative CLSM images of WT and Sp-HUS EVs (pre-  
938 stained with DiD, red) internalization by endothelial cells (WGA CF@488A, green). Scale bar = 10  $\mu$ m.  
939 (F) Fluorescence intensity of WT (blue bar) and Sp-HUS (red bar) EVs signal expressed in arbitrary  
940 units (AU). Means are shown from biological triplicates. Mean  $\pm$  SD.

## Figure 4

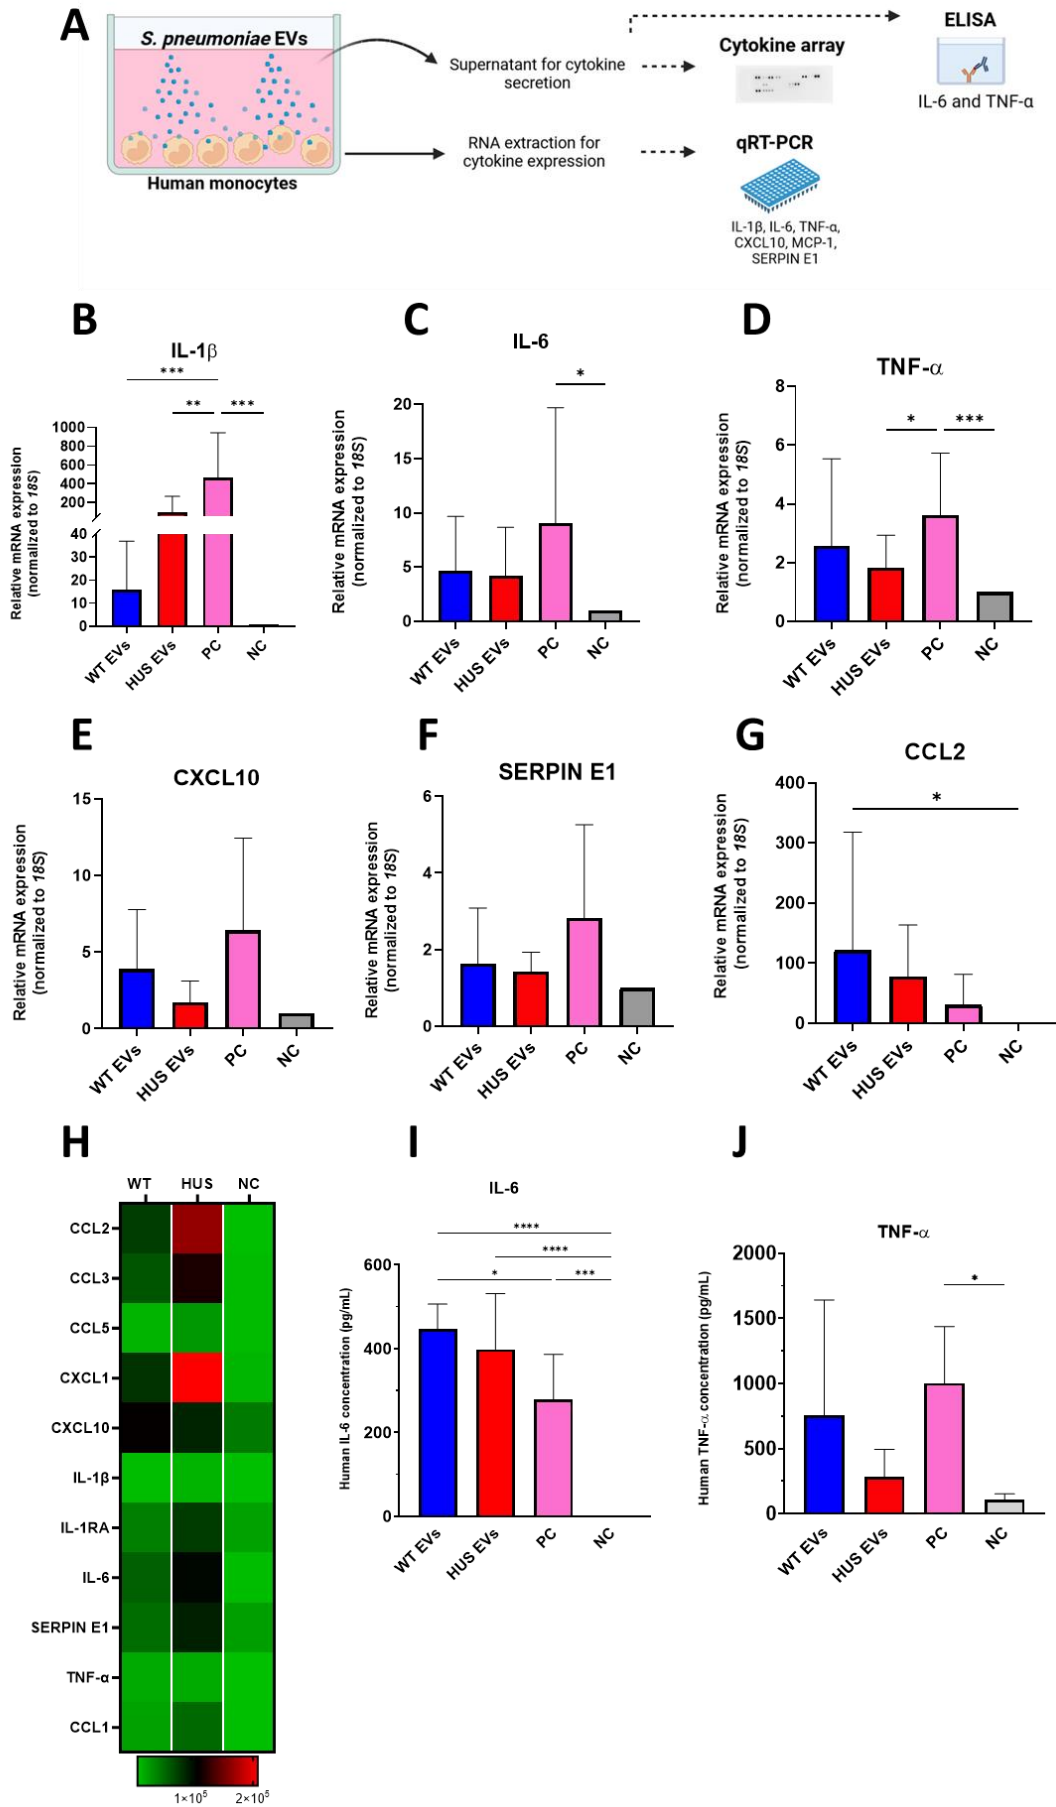



942 **Figure 4. Cytokine expression and production by human monocytes in response to pneumococcal**  
943 **EVs. (A)** Schematic representation of experiments performed to analyze EVs-induced cytokine  
944 expression and production by human monocytes. Monocytes from healthy donors were incubated with  
945 WT or Sp-HUS EVs. **(B-G)** Total RNA extracted from monocytes was used to assess transcriptional  
946 levels of IL-1 $\beta$ , IL-6, TNF- $\alpha$ , CXCL10, SERPIN E1 and CCL2 by qRT-PCR. **(H)** Supernatants were  
947 used to detect cytokine production using a Proteome Profiler Human Cytokine Array. Heat map shows  
948 11 cytokines deregulated in monocytes. **(I, J)** IL-6 and TNF- $\alpha$  production by monocytes quantified by  
949 ELISA. In all experiments, untreated monocytes and zymosan treatment (100  $\mu$ g/mL) were considered  
950 the negative (grey bar) and positive (pink bar) controls, respectively. Means are shown from several  
951 healthy human donors. Mean  $\pm$  SD.

952 **Tables**

**Table 1- Differentially expressed genes (Sp-HUS vs WT)**

| Downregulated |                |            | Upregulated |                |            |
|---------------|----------------|------------|-------------|----------------|------------|
| Gene          | log2FoldChange | Pvalue adj | Gene        | log2FoldChange | Pvalue adj |
| rfbA          | -12,18         | 2,97E-87   | nanB        | 5,65           | 4,27E-8    |
| rfbB          | -11,99         | 1,91E-57   | lytA        | 3,14           | 2,36E-6    |
| rfbD          | -11,82         | 1,83E-34   | pcpA        | 3,05           | 1,75E-12   |
| rgg1518       | -9,75          | 3,00E-23   | queF        | 3,00           | 2,90E-4    |
| lanM          | -9,17          | 7,59E-19   | adhP        | 2,82           | 7,05E-8    |
| celB          | -9,16          | 7,60E-20   | nrdD        | 2,80           | 1,31E-4    |
| pneA2         | -8,29          | 8,19E-14   | nrdG        | 2,27           | 5,20E-3    |
| efeB          | -8,18          | 2,31E-15   | galE        | 2,26           | 3,64E-11   |
| pneA1         | -7,79          | 1,90E-14   | psaA        | 2,09           | 6,13E-4    |
| treP          | -3,77          | 2,08E-5    | nanA        | 2,08           | 2,12E-5    |
| treC          | -3,59          | 6,89E-6    | tnpB        | 2,05           | 3,07E-19   |
| zmpB          | -3,11          | 1,54E-11   | adhE        | 1,94           | 3,78E-4    |
| tnpB          | -2,37          | 6,61E-40   | vex3        | 1,92           | 1,25E-9    |
| ltrA          | -2,30          | 1,35E-8    | glpK        | 1,91           | 6,46E-3    |
| rpsT          | -2,19          | 4,13E-4    | xerS        | 1,90           | 3,86E-5    |
| mscL          | -2,17          | 2,60E-4    | dltC        | 1,89           | 1,13E-2    |
| deoC          | -2,17          | 1,66E-4    | vex2        | 1,85           | 6,16E-7    |
| dapA          | -1,92          | 1,41E-3    | dnaK        | 1,80           | 2,07E-3    |
| secG          | -1,90          | 1,93E-3    | glgA        | 1,79           | 6,39E-8    |
| tpx           | -1,84          | 8,88E-10   | glgD        | 1,78           | 6,68E-9    |
| sstT          | -1,84          | 1,02E-3    | purB        | 1,72           | 2,01E-2    |
| ssrA          | -1,73          | 3,28E-9    | bgaA        | 1,70           | 1,29E-2    |
| rpsU          | -1,70          | 8,94E-3    | ugpC        | 1,51           | 2,19E-9    |
| tnpA          | -1,60          | 2,72E-2    | spuA        | 1,50           | 1,97E-7    |
| sufB          | -1,53          | 5,06E-3    | glgB        | 1,50           | 3,40E-14   |

953

954

955

**Table 2. Proteins with higher abundance in Sp-HUS EVs than WT EVs**

| Protein ID            | Protein name                                                                                                                               | Gene name and locus |
|-----------------------|--------------------------------------------------------------------------------------------------------------------------------------------|---------------------|
| A0A0H2ZQ39            | 50S ribosomal subunit assembly factor <b>BipA</b> (EC 3.6.5.-) (GTP-binding protein BipA)                                                  | bipA SPD_0593       |
| Q04L76                | Purine nucleoside phosphorylase DeoD-type ( <b>PNP</b> ) (EC 2.4.2.1)                                                                      | deoD SPD_0730       |
| A0A0H2ZMC0            | 3-oxoacyl-[acyl-carrier-protein] reductase (EC 1.1.1.100)                                                                                  | fabG SPD_0384       |
| A0A0H2ZNV9            | Glucose-1-phosphate adenyltransferase, <b>GlgD</b> subunit (EC 2.7.7.27)                                                                   | glgD SPD_1007       |
| Q04HZ0                | Glycerol kinase (EC 2.7.1.30) (ATP:glycerol 3-phosphotransferase) (Glycerokinase) ( <b>GK</b> )                                            | glpK SPD_2013       |
| A0A0H2ZLA5            | 6-phosphogluconate dehydrogenase, decarboxylating (EC 1.1.1.44)                                                                            | gnd SPD_0343        |
| Q04JB4                | 2,3-bisphosphoglycerate-dependent phosphoglycerate mutase (BPG-dependent PGAM) (PGAM) (Phosphoglyceromutase) ( <b>dPGM</b> ) (EC 5.4.2.11) | gpmA SPD_1468       |
| A0A0H2ZNC0            | 1,4-beta-N-acetylmuramidase, putative (EC 3.2.1.96)                                                                                        | lytC SPD_1403       |
| A0A0H2ZPB4            | NADH oxidase (EC 1.6.99.3)                                                                                                                 | nox SPD_1298        |
| Q04MI4                | Proline--tRNA ligase (EC 6.1.1.15) (Prolyl-tRNA synthetase) (ProRS)                                                                        | proS SPD_0246       |
| A0A0H2ZMX6;A0A0H2ZLS0 | Pneumococcal surface protein A                                                                                                             | pspA SPD_0126       |
| A0A0H2ZMY1            | Phosphoenolpyruvate-protein phosphotransferase (EC 2.7.3.9) (Phosphotransferase system, enzyme I)                                          | ptsI SPD_1039       |
| A0A0H2ZMK9            | Oxidoreductase, pyridine nucleotide-disulfide, class I                                                                                     | SPD_1415            |
| A0A0H2ZN12            | Putative oxidoreductase (EC 1.-.-.-)                                                                                                       | SPD_1590            |
| A0A0H2ZNN3            | General stress protein 24, putative                                                                                                        | SPD_1644            |

956

957
